# Supplementary material for: Network Biology of Tumor Stem-like Cells Identified a Regulatory Role of CBX5 in Lung Cancer
Source: PubMed Central journal article supplement — Sci Rep. 2012 Aug 16;2:584. doi: 10.1038/srep00584 (PMC3419921; doi:10.1038/srep00584), 2012-08-16
Supplement: srep00584-s1.pdf [file srep00584-s1.pdf]

## **Supplementary Information**

### **Network Biology of Tumor Stem-like Cells Identified a Regulatory Role of Cbx5 in Lung Cancer**

Yau-Hua Yu, Guang-Yuh Chiou, Wen-Liang Lo, Chien-Ying Wang, Kai-Hsi Lu, Cheng-Chia Yu, Gil Alterovitz, Pin-I Huang, Wen-Chien Huang , Jeng-Fan Lo, Han-Shui Hsu, Shih-Hwa Chiou

#### **Contents:**

Figure S1 – Flow chart of analysis

Figure S2 – Consensus TSLC networks

Figure S3 – Panel classification among PTCs, TSLCs, and hESCs

Figure S4 – Gene expression dynamics of DNMT3A among PTCs, TSLCs, and hESCs

Figure S5 – Lung TSLC networks

Table S1 – Description of the used in the analysis to come up with the concordant consensus gene signature

Table S2&3 – Consensus TSLC networks

Table S4&5 – Lung TSLC networks

Table S6 –Survival analysis of lung cancer transcriptome using the consensus and lung TSLC network models

Table S7 – Clinicopathological characteristics of 125 patients with lung adenocarcinoma

#### **Data and code repository:**

<https://sites.google.com/site/nwtoposignalincancer/>

| Tissue / Condition                   | Lung                        | GBM   | ATRT  | Breast | Head Neck | Colon | Snail-over | SF-sphere |
|--------------------------------------|-----------------------------|-------|-------|--------|-----------|-------|------------|-----------|
| G_stemCaEMT                          | 13048 probes (5812 geneIDs) |       |       |        |           |       |            |           |
| Cancer-specific alternative splicing | 801                         | 628   | 628   | 706    | 171       | 511   | 0          | 0         |
| Total probes                         | 13849                       | 13676 | 13676 | 13754  | 13219     | 13559 | 13048      | 13048     |

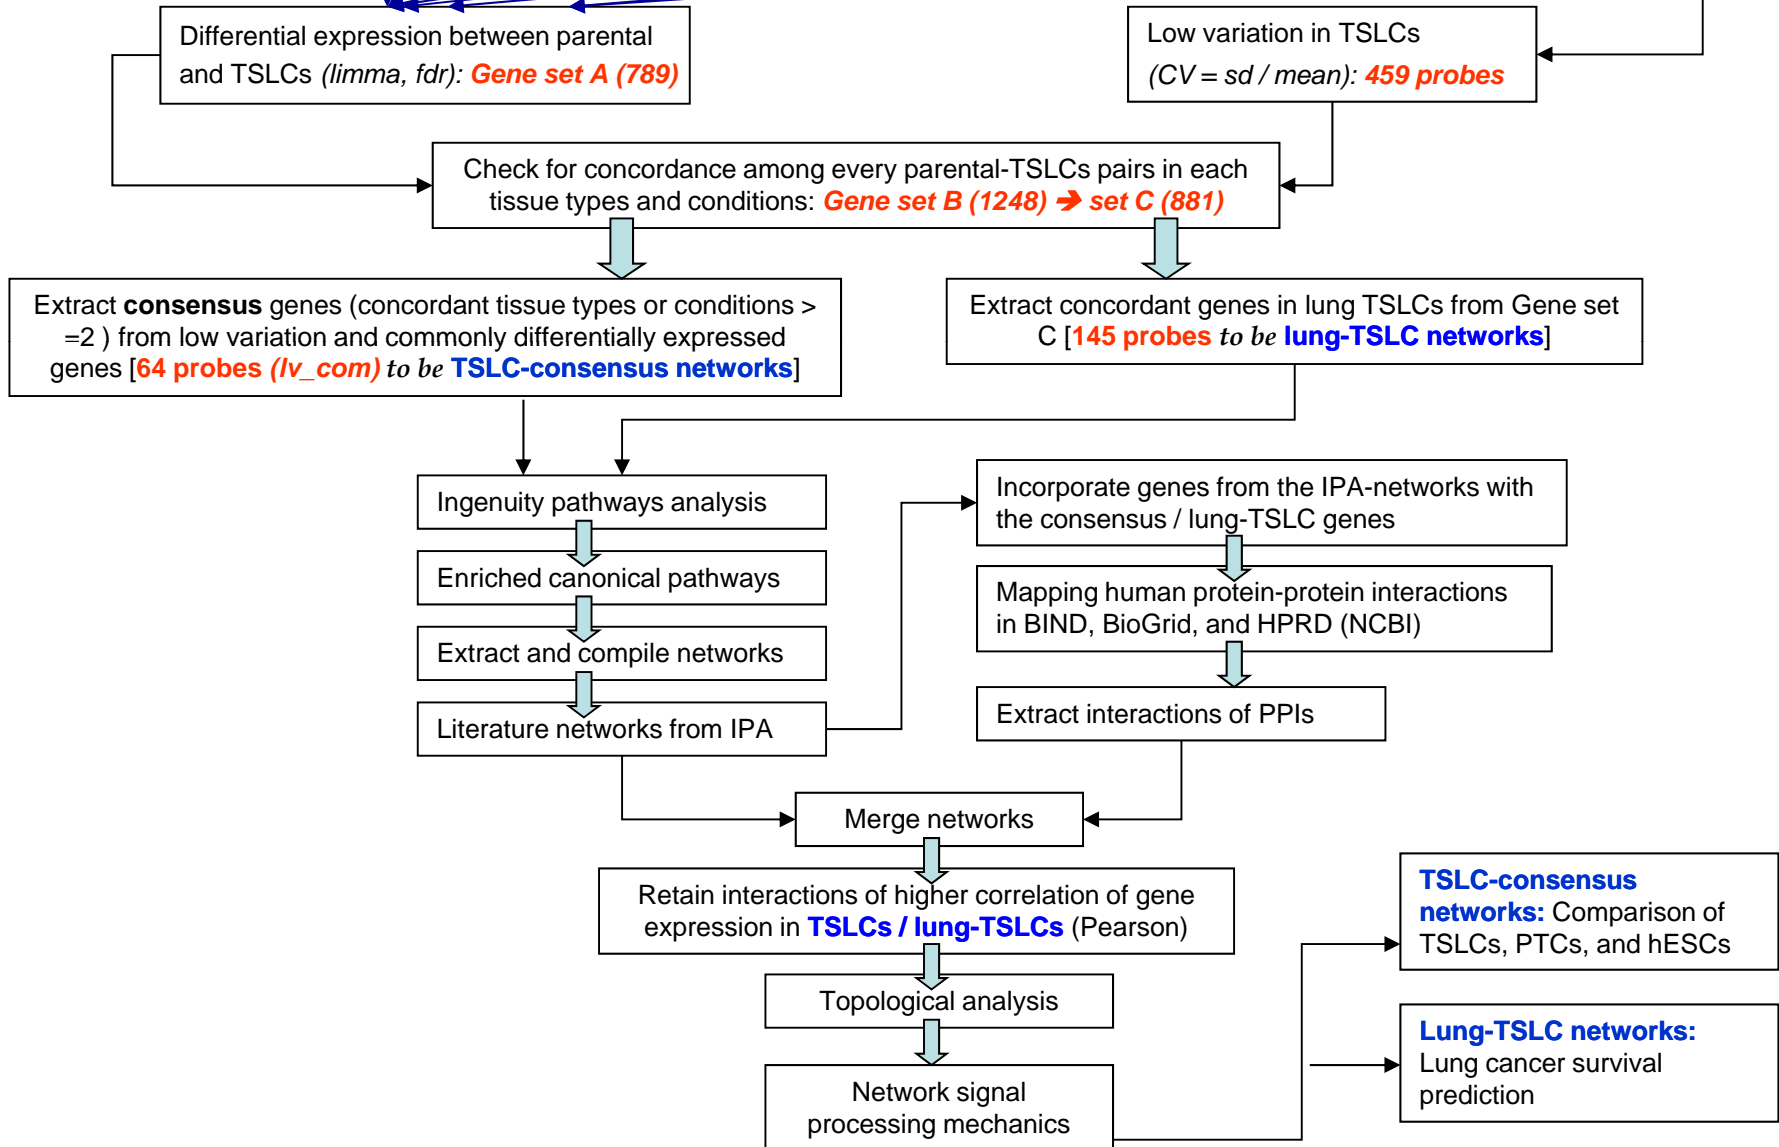

**A****Inter-modular Hubs Expression**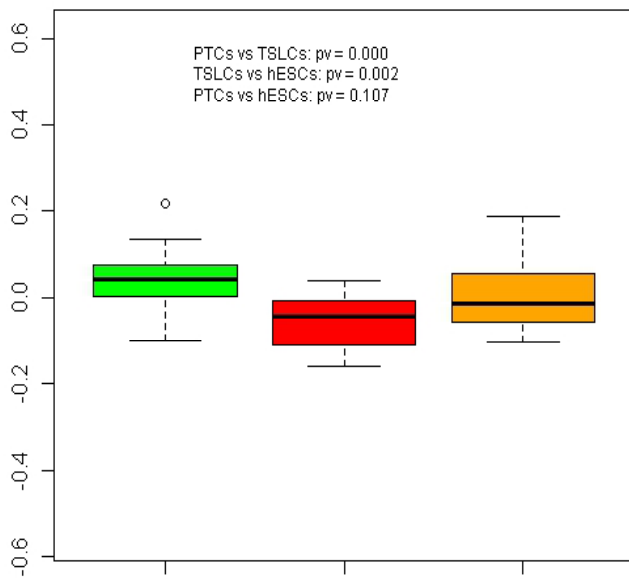**B****Inter-modular Hubs SNR**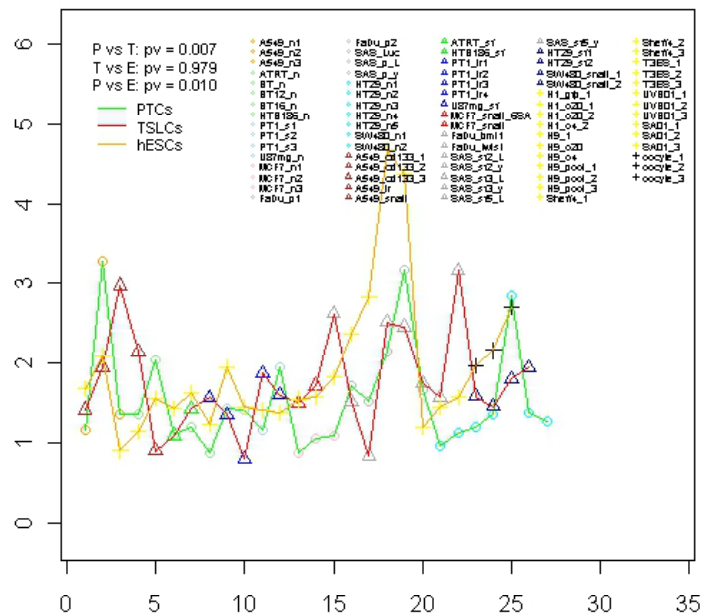**C****Kruskal's Non-metric Multidimensional Scaling**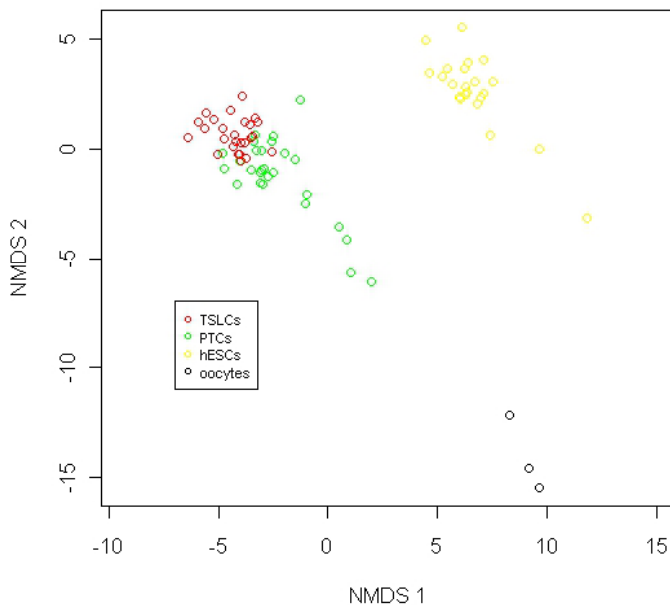**D**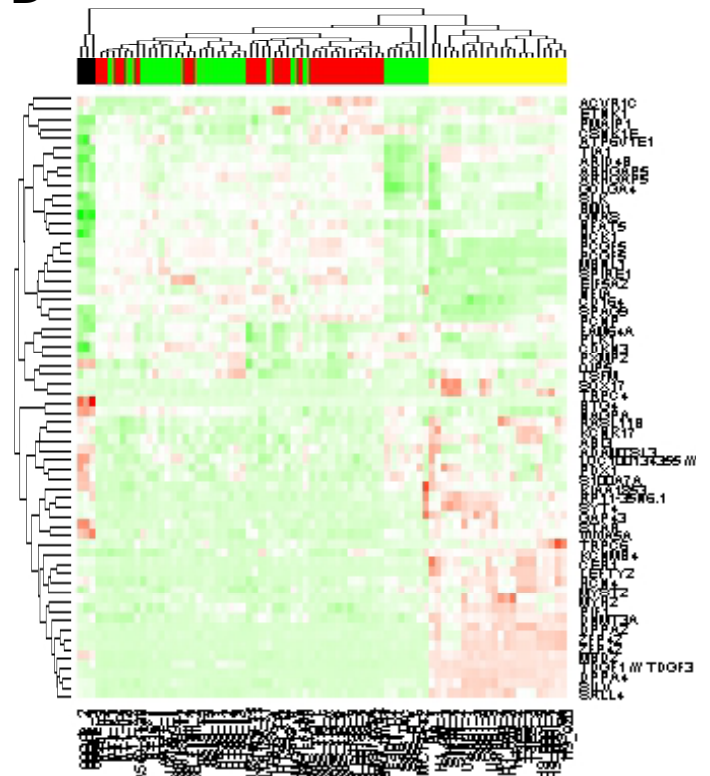

(A) Box plots of averaged expression levels and (B) dynamic ranges of SNR of inter-modular hubs in the consensus TSLC networks were plotted for PTCs, TSLCs and hESCs. Clustering of oocytes, hESCs, TSLCs, and PTCs displayed (C) in the 2-D NMDS plot and (D) heatmap using gene signatures of *lv\_com*.

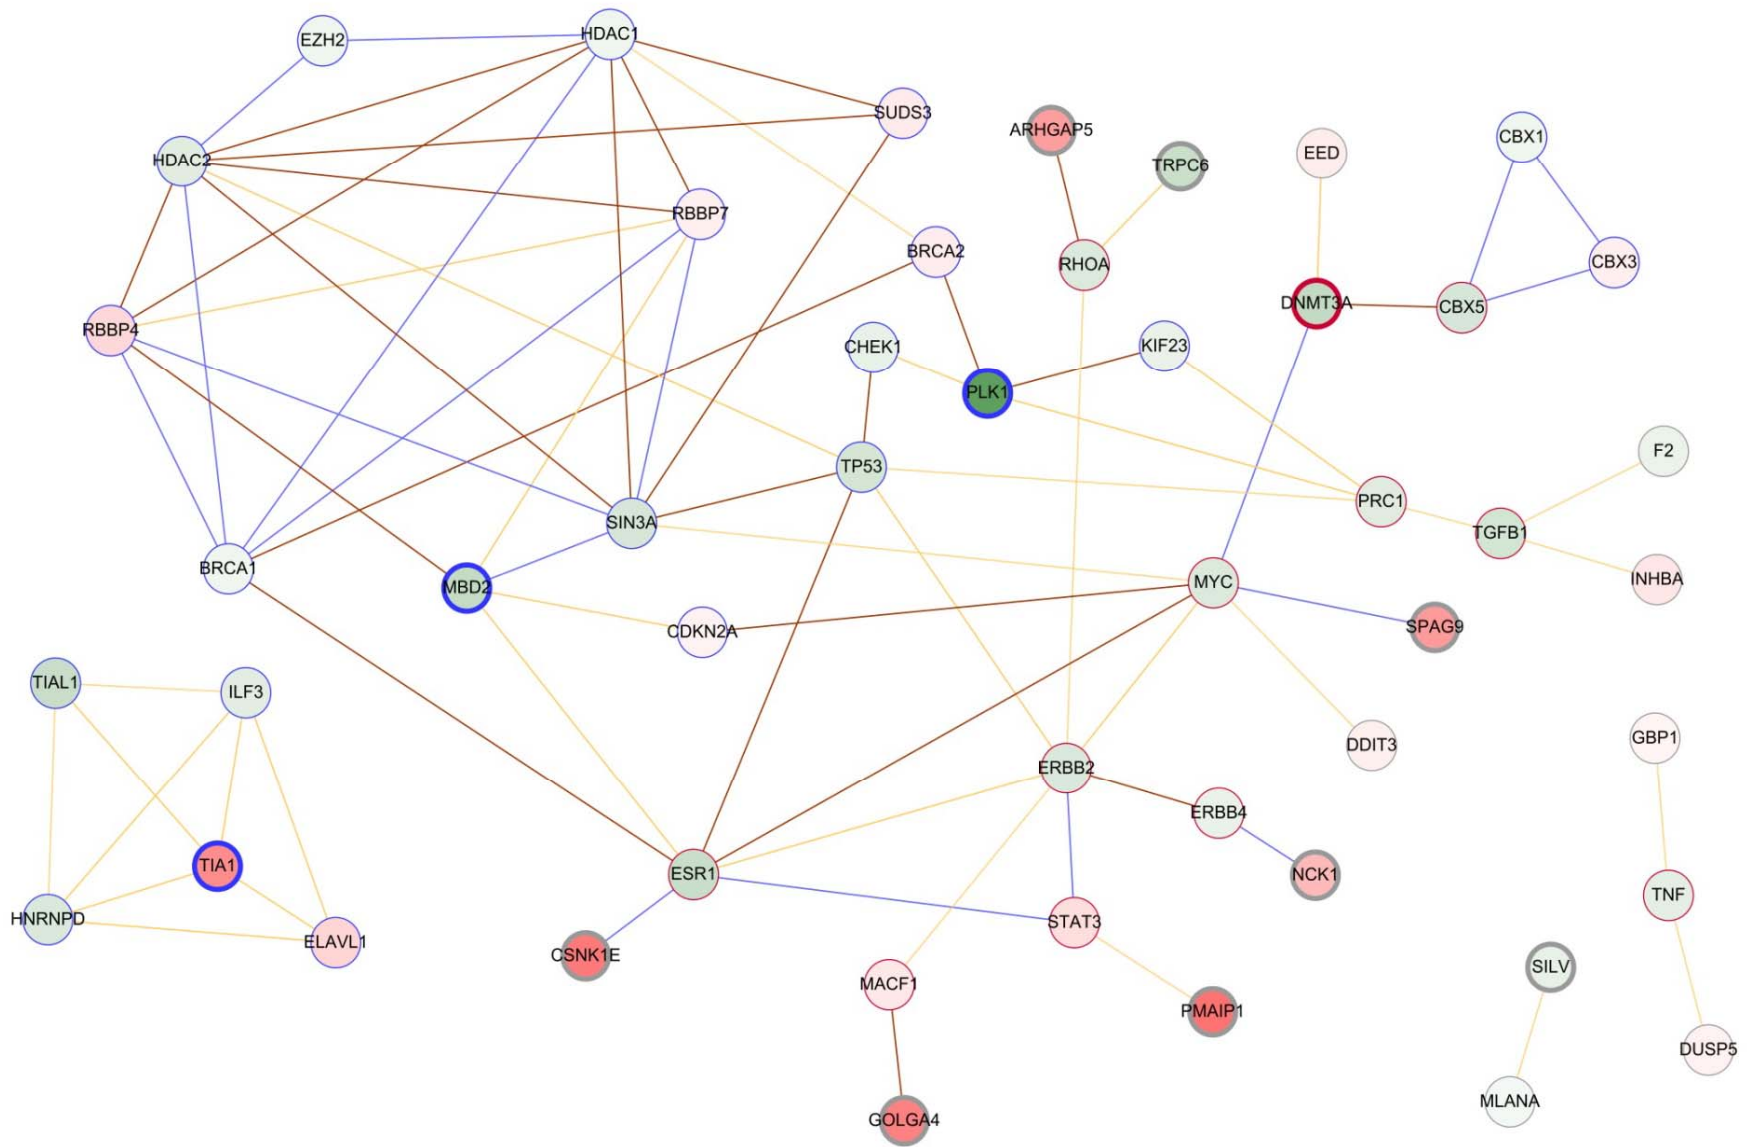

**Color bar of differential gene expression:**

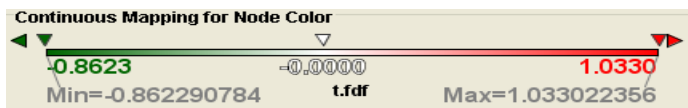

**Topological classification:**

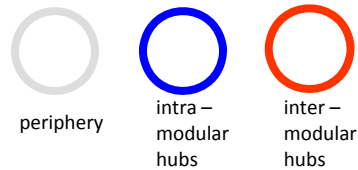

**Functional association reported from various databases:**

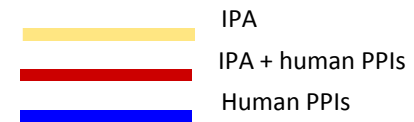

## Gene expression - DNMT3A

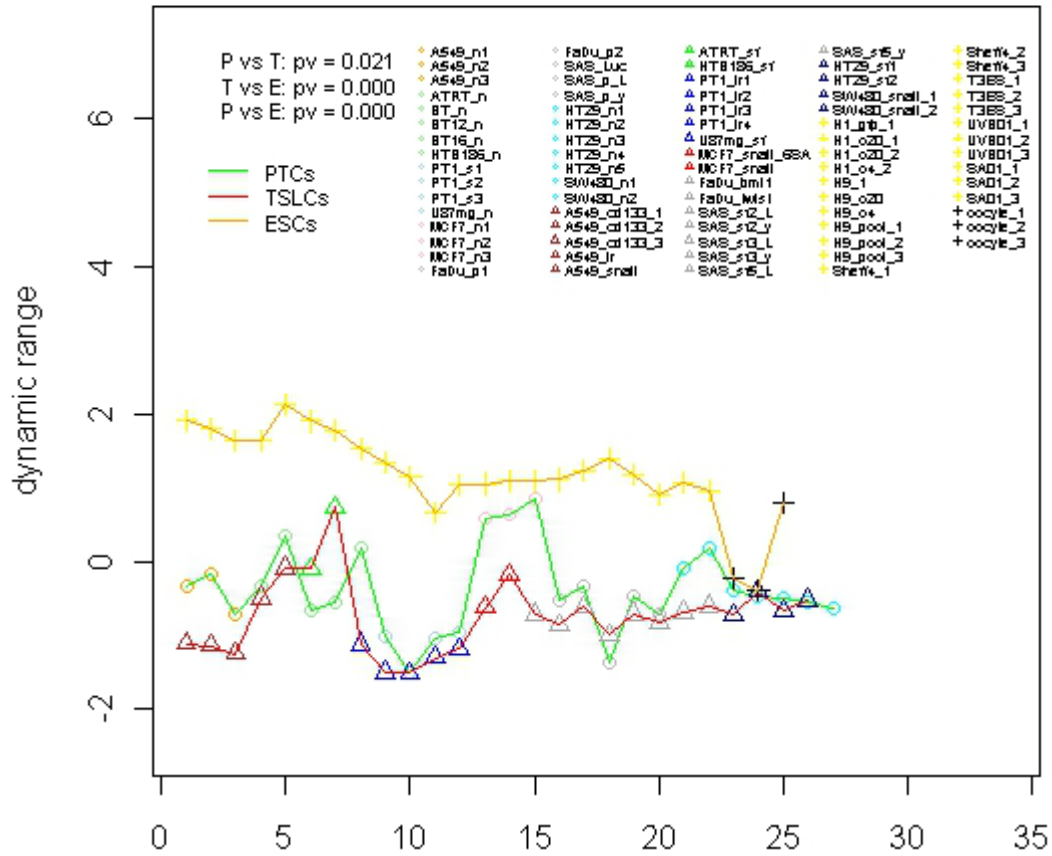

Dynamic ranges of averaged expression levels of DNMT3A in the consensus TSLC networks were plotted for PTCs, TSLCs and hESCs.

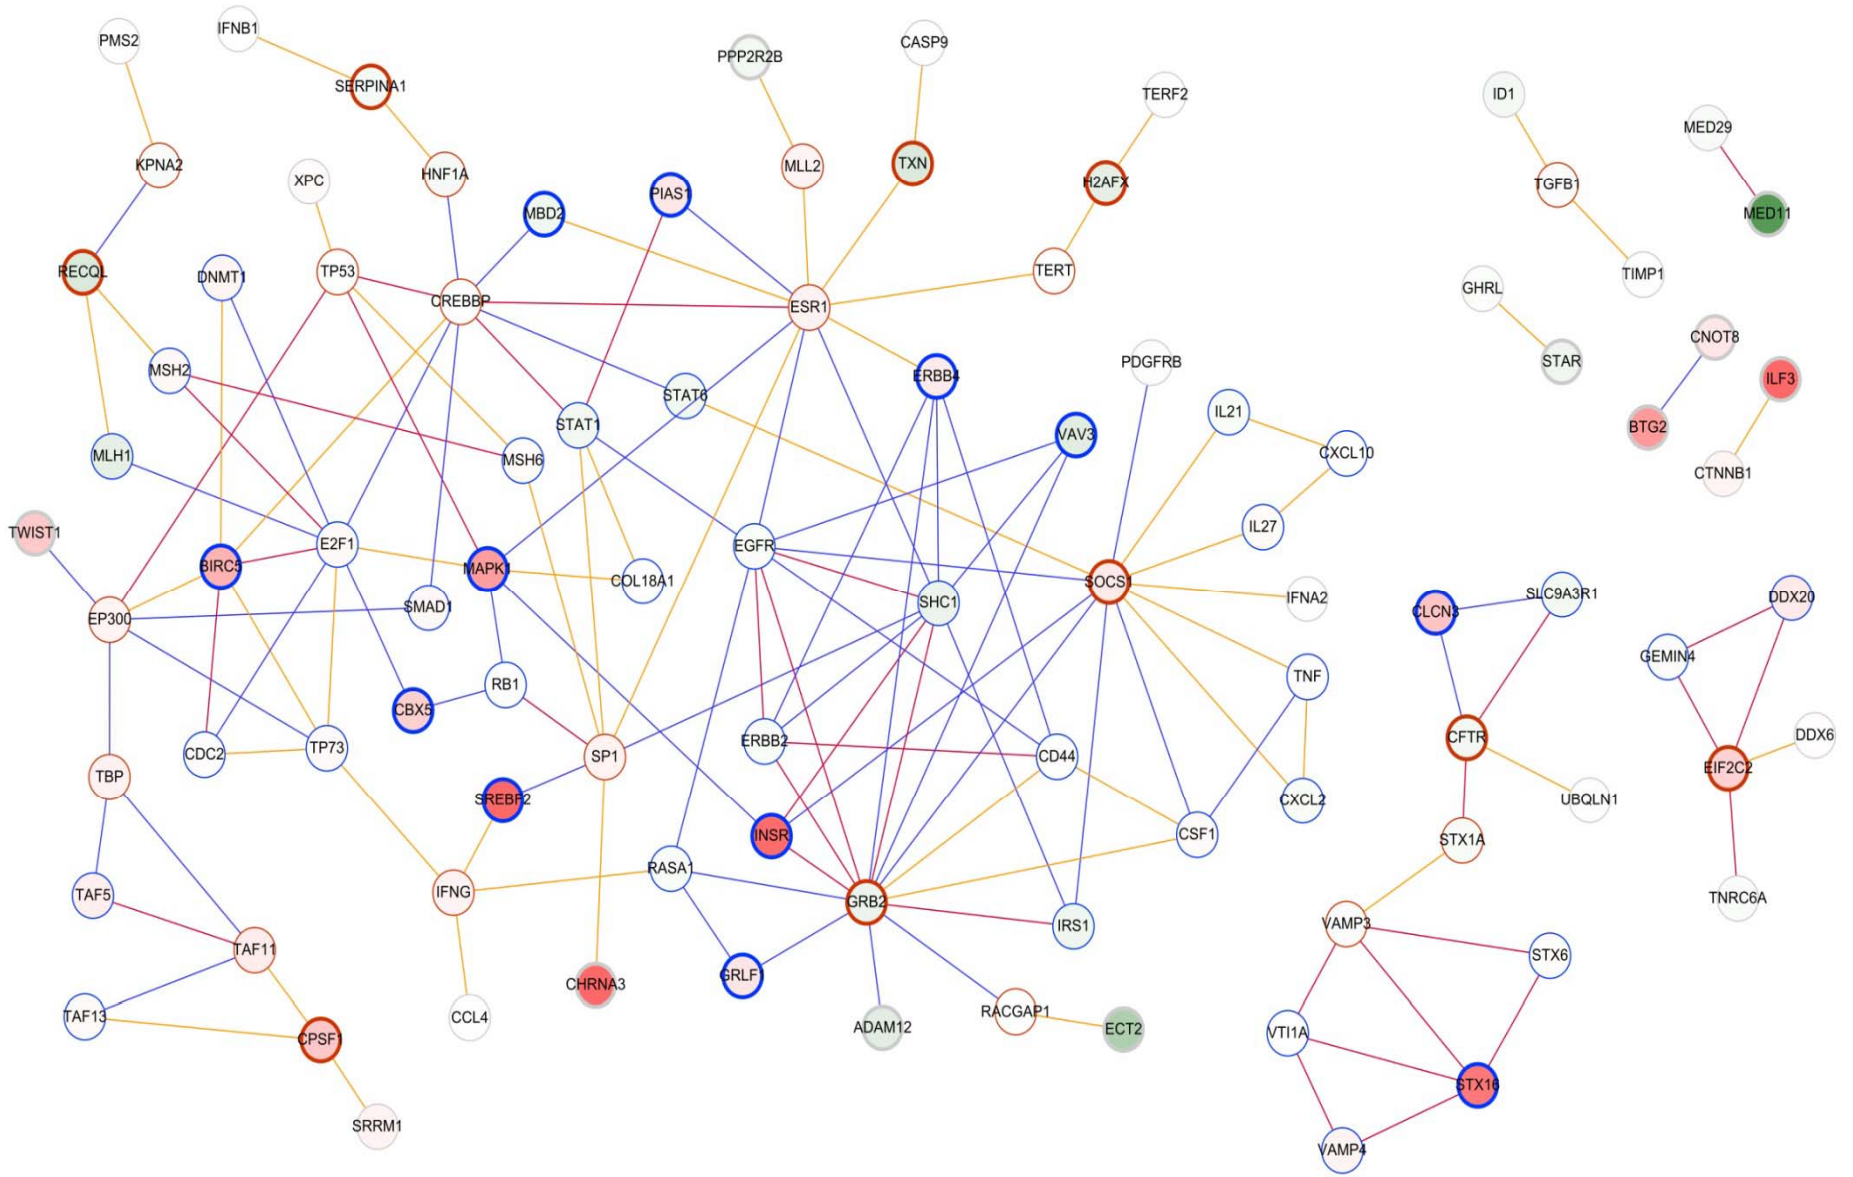

**Color bar of differential gene expression:**

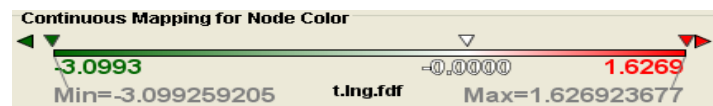

**Topological classification:**

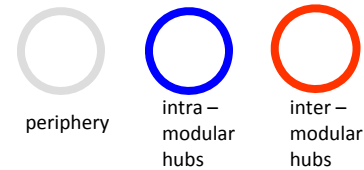

**Functional association reported from various databases:**



Table S1 Microarray Data Sets

| Cancer tissue types /<br>Experimental conditions | Parental Tumor<br>Cells (PTCs) | No. | Tumor Stem-Like Cells<br>(TSLCs) | No. | Human Embryonic Stem<br>Cells (hESCs) | Feeder_cond   | No. |
|--------------------------------------------------|--------------------------------|-----|----------------------------------|-----|---------------------------------------|---------------|-----|
| <b>Glioblastoma</b><br>(gbm)                     | PT1-s                          | 3   | PT1-ir                           | 4   | H1                                    |               | 5   |
|                                                  | U87-n                          | 1   | U87-sf                           | 1   | H1                                    | 4% and 20% O2 | 4   |
| <b>ATRT</b>                                      | atrt-n                         | 1   | atrt-sf                          | 1   | H9                                    |               | 8   |
| <b>Medulloblastoma</b><br>(atrt)                 | HTB186-n                       | 1   | HTB186-sf                        | 1   | H9                                    | 4% and 20% O2 | 2   |
|                                                  | BT16-s                         | 1   |                                  |     |                                       |               |     |
|                                                  | BT                             | 1   |                                  |     |                                       |               |     |
|                                                  | BT12-s                         | 1   |                                  |     |                                       |               |     |
| <b>HNSCC</b><br>(oral_or)                        | sas-n                          | 3   | sas-sf (2,3,5)                   | 6   | Sheff 4 hesc                          | MEFs          | 3   |
|                                                  | FaDu                           | 2   | FaDu_twist, bmi1                 | 2   |                                       |               |     |
| <b>Breast</b><br>(br)                            | MCF7                           | 3   | MCF7_snail                       | 2   | SA01                                  |               | 3   |
| <b>Colon</b><br>(cn)                             | SW480                          | 2   | SW480_snail                      | 2   | VUB01                                 |               | 3   |
|                                                  | HT29-n                         | 5   | HT29-sf                          | 2   |                                       |               |     |
| <b>Lung</b><br>(lq)                              | A549-n                         | 3   | A549-ir                          | 1   | T3ES                                  |               | 3   |
|                                                  |                                |     | A549_cd133                       | 3   |                                       |               |     |
|                                                  |                                |     | A549_snail                       | 1   |                                       |               |     |
| <b>Serum-free sphere</b><br>(sf)                 | U87-n                          | 1   | U87-sf                           |     | oocyte                                |               | 3   |
|                                                  | atrt-n                         | 1   | atrt-sf                          | 1   |                                       |               |     |
|                                                  | HTB186-n                       | 1   | HTB186-sf                        | 1   |                                       |               |     |
|                                                  | sas-n                          | 3   | sas-sf (2,3,5)                   | 6   |                                       |               |     |
|                                                  | HT29-n                         | 5   | HT29-sf                          | 2   |                                       |               |     |
| <b>Over-expression of</b><br>(snail)             | FaDu                           | 2   | FaDu_twist, bmi1                 | 2   |                                       |               |     |
|                                                  | MCF7                           | 3   | MCF7_snail                       | 2   |                                       |               |     |
|                                                  | SW480                          | 2   | SW480_snail                      | 2   |                                       |               |     |
|                                                  | A549                           | 3   | A549_snail                       | 1   |                                       |               |     |

| <b>Tissue Types / Conditions</b>      | <b>Abbreviation</b> | <b>Number of Chips</b> | <b>87.5% of Absolute Values of Fold Changes</b> |
|---------------------------------------|---------------------|------------------------|-------------------------------------------------|
| Glioblastoma                          | gbm                 | 9                      | 1.37                                            |
| AT/RT and Medulloblastoma             | atrt                | 7                      | 1.68                                            |
| HNSCC                                 | or                  | 13                     | 1.79                                            |
| Breast                                | br                  | 5                      | 1.67                                            |
| Colon                                 | cn                  | 11                     | 1.71                                            |
| Lung                                  | lng                 | 8                      | 1.62                                            |
| Over-expression of Snail, Bmi1, Twist | snail               | 17                     | 1.23                                            |
| Serum free sphere forming             | sf                  | 22                     | 1.32                                            |



Table S2 Consensus TSLC networks (Edges)

| a.sym  | b.sym   | a.gid | b.gid | #dbs | database                 | a.pb          | b.pb        | corr      |
|--------|---------|-------|-------|------|--------------------------|---------------|-------------|-----------|
| ESR1   | MYC     | 2099  | 4609  | 2    | BIND-IPA.n1              | 211234_x_at   | 202431_s_at | 0.4448037 |
| ESR1   | TP53    | 2099  | 7157  | 4    | BioGRID-HPRD-BIND-IPA.n1 | 217163_at     | 201746_at   | 0.4623676 |
| BRCA1  | ESR1    | 672   | 2099  | 3    | BioGRID-HPRD-IPA.n1      | 211851_x_at   | 215551_at   | 0.4634535 |
| TP53   | SIN3A   | 7157  | 25942 | 2    | BIND-IPA.n1              | 211300_s_at   | 225135_at   | 0.4099827 |
| HDAC2  | RBBP4   | 3066  | 5928  | 3    | BioGRID-HPRD-IPA.n1      | 201833_at     | 210371_s_at | 0.7315502 |
| HDAC1  | RBBP4   | 3065  | 5928  | 4    | BioGRID-HPRD-BIND-IPA.n1 | 201209_at     | 210371_s_at | 0.7248656 |
| BRCA1  | BRCA2   | 672   | 675   | 4    | BioGRID-HPRD-BIND-IPA.n1 | 211851_x_at   | 214727_at   | 0.7893156 |
| SIN3A  | SUDS3   | 25942 | 64426 | 2    | BioGRID-IPA.n1           | 225135_at     | 233841_s_at | 0.6568272 |
| RBBP4  | MBD2    | 5928  | 8932  | 3    | BioGRID-HPRD-IPA.n1      | 217301_x_at   | 214396_s_at | 0.4646377 |
| HDAC1  | RBBP7   | 3065  | 5931  | 2    | BioGRID-IPA.n1           | 201209_at     | 201092_at   | 0.4255271 |
| HDAC2  | RBBP7   | 3066  | 5931  | 2    | BioGRID-IPA.n1           | 201833_at     | 201092_at   | 0.5747854 |
| ERBB2  | ERBB4   | 2064  | 2066  | 2    | BioGRID-IPA.n2           | 216836_s_at   | 233494_at   | 0.4383003 |
| RHOA   | ARHGAP5 | 387   | 394   | 2    | BioGRID-IPA.n2           | 1555814_a_at  | 217936_at   | 0.4060502 |
| BRCA2  | PLK1    | 675   | 5347  | 2    | BioGRID-IPA.n1           | 208368_s_at   | 202240_at   | 0.742489  |
| CDKN2A | MYC     | 1029  | 4609  | 2    | BIND-IPA.n1              | 209644_x_at   | 202431_s_at | 0.5367128 |
| CHEK1  | TP53    | 1111  | 7157  | 3    | BioGRID-HPRD-IPA.n1      | 205393_s_at   | 211300_s_at | 0.5828072 |
| DNMT3A | CBX5    | 1788  | 23468 | 2    | BioGRID-IPA.n2           | 244428_at     | 242069_at   | 0.7219506 |
| GOLGA4 | MACF1   | 2803  | 23499 | 3    | BIND-HPRD-IPA.n2         | 215203_at     | 232168_x_at | 0.770862  |
| HDAC1  | HDAC2   | 3065  | 3066  | 3    | BioGRID-HPRD-IPA.n1      | 201209_at     | 201833_at   | 0.7017465 |
| HDAC1  | SIN3A   | 3065  | 25942 | 4    | BioGRID-BIND-HPRD-IPA.n1 | 201209_at     | 238005_s_at | 0.6020143 |
| HDAC1  | SUDS3   | 3065  | 64426 | 2    | BioGRID-IPA.n1           | 201209_at     | 224974_at   | 0.6532894 |
| HDAC2  | SIN3A   | 3066  | 25942 | 4    | BioGRID-BIND-HPRD-IPA.n1 | 201833_at     | 238005_s_at | 0.6187318 |
| HDAC2  | SUDS3   | 3066  | 64426 | 2    | BioGRID-IPA.n1           | 201833_at     | 224974_at   | 0.5477465 |
| PLK1   | KIF23   | 5347  | 9493  | 2    | HPRD-IPA.n1              | 202240_at     | 204709_s_at | 0.8933461 |
| CHEK1  | PLK1    | 1111  | 5347  | 1    |                          | 1 205393_s_at | 202240_at   | 0.6306712 |
| TP53   | PRC1    | 7157  | 9055  | 1    |                          | 1 211300_s_at | 218009_s_at | 0.472979  |
| ESR1   | ERBB2   | 2099  | 2064  | 1    |                          | 1 217163_at   | 216836_s_at | 0.5622145 |
| TGFB1  | PRC1    | 7040  | 9055  | 1    |                          | 1 203084_at   | 218009_s_at | -0.445663 |
| TNF    | DUSP5   | 7124  | 1847  | 1    |                          | 1 207113_s_at | 209457_at   | 0.4055571 |
| TNF    | GBP1    | 7124  | 2633  | 1    |                          | 1 207113_s_at | 231578_at   | 0.4390259 |
| ERBB2  | MYC     | 2064  | 4609  | 1    |                          | 1 234354_x_at | 244089_at   | 0.5345625 |
| ERBB2  | TP53    | 2064  | 7157  | 1    |                          | 1 216836_s_at | 201746_at   | 0.5287188 |
| STAT3  | PMAIP1  | 6774  | 5366  | 1    |                          | 1 243213_at   | 204285_s_at | 0.4541879 |
| TP53   | HDAC2   | 7157  | 3066  | 1    |                          | 1 211300_s_at | 201833_at   | 0.5072621 |
| SIN3A  | MYC     | 25942 | 4609  | 1    |                          | 1 238189_at   | 244089_at   | 0.4375127 |
| HDAC1  | BRCA2   | 3065  | 675   | 1    |                          | 1 201209_at   | 214727_at   | 0.4556454 |
| MYC    | DDIT3   | 4609  | 1649  | 1    |                          | 1 244089_at   | 209383_at   | 0.4326038 |
| MBD2   | ESR1    | 8932  | 2099  | 1    |                          | 1 202485_s_at | 211233_x_at | 0.5747414 |
| MBD2   | CDKN2A  | 8932  | 1029  | 1    |                          | 1 214396_s_at | 207039_at   | 0.5026108 |
| KIF23  | PRC1    | 9493  | 9055  | 1    |                          | 1 204709_s_at | 218009_s_at | 0.7708755 |
| PRC1   | PLK1    | 9055  | 5347  | 1    |                          | 1 218009_s_at | 202240_at   | 0.8164269 |
| RBBP7  | RBBP4   | 5931  | 5928  | 1    |                          | 1 201092_at   | 217301_x_at | 0.7137153 |
| MBD2   | RBBP7   | 8932  | 5931  | 1    |                          | 1 214396_s_at | 201092_at   | 0.5314243 |

|        |        |       |       |   |                   |               |              |           |
|--------|--------|-------|-------|---|-------------------|---------------|--------------|-----------|
| TGFB1  | INHBA  | 7040  | 3624  | 1 |                   | 2 203084_at   | 210511_s_at  | 0.4625732 |
| TRPC6  | RHOA   | 7225  | 387   | 1 |                   | 2 206528_at   | 240337_at    | 0.5669307 |
| F2     | TGFB1  | 2147  | 7040  | 1 |                   | 2 205754_at   | 203085_s_at  | 0.4145961 |
| ERBB2  | RHOA   | 2064  | 387   | 1 |                   | 2 210930_s_at | 1555814_a_at | 0.4800704 |
| ERBB2  | MACF1  | 2064  | 23499 | 1 |                   | 2 216836_s_at | 241896_at    | 0.4428346 |
| DNMT3A | EED    | 1788  | 8726  | 1 |                   | 2 244428_at   | 209572_s_at  | 0.6196614 |
| MLANA  | SILV   | 2315  | 6490  | 1 |                   | 2 206427_s_at | 209848_s_at  | 0.4420115 |
| TIA1   | ILF3   | 7072  | 3609  | 1 |                   | 2 201447_at   | 217804_s_at  | 0.6419677 |
| TIA1   | ELAVL1 | 7072  | 1994  | 1 |                   | 2 201449_at   | 244660_at    | 0.6890435 |
| TIA1   | TIAL1  | 7072  | 7073  | 1 |                   | 2 201446_s_at | 202405_at    | 0.7581311 |
| HNRNPD | TIAL1  | 3184  | 7073  | 1 |                   | 2 227744_s_at | 202405_at    | 0.4516152 |
| HNRNPD | TIA1   | 3184  | 7072  | 1 |                   | 2 221481_x_at | 201450_s_at  | 0.6862381 |
| HNRNPD | ILF3   | 3184  | 3609  | 1 |                   | 2 209330_s_at | 208931_s_at  | 0.9188382 |
| HNRNPD | ELAVL1 | 3184  | 1994  | 1 |                   | 2 209330_s_at | 201726_at    | 0.7109695 |
| TIAL1  | ILF3   | 7073  | 3609  | 1 |                   | 2 202405_at   | 217804_s_at  | 0.4189879 |
| ELAVL1 | ILF3   | 1994  | 3609  | 1 |                   | 2 201726_at   | 208931_s_at  | 0.791773  |
| BRCA1  | RBBP7  | 672   | 5931  | 3 | BioGRID-HPRD-BIND | 211851_x_at   | 201092_at    | 0.7789275 |
| BRCA1  | RBBP4  | 672   | 5928  | 3 | BioGRID-HPRD-BIND | 211851_x_at   | 217301_x_at  | 0.7852398 |
| BRCA1  | HDAC1  | 672   | 3065  | 3 | BioGRID-HPRD-BIND | 204531_s_at   | 201209_at    | 0.5243523 |
| BRCA1  | HDAC2  | 672   | 3066  | 3 | BioGRID-HPRD-BIND | 211851_x_at   | 201833_at    | 0.6763091 |
| CSNK1E | ESR1   | 1454  | 2099  | 1 | BIND              | 222015_at     | 215551_at    | 0.7100838 |
| DNMT3A | MYC    | 1788  | 4609  | 3 | BioGRID-HPRD-BIND | 244428_at     | 202431_s_at  | 0.482701  |
| ERBB2  | STAT3  | 2064  | 6774  | 1 | BioGRID           | 210930_s_at   | 208992_s_at  | 0.4799372 |
| ERBB4  | NCK1   | 2066  | 4690  | 1 | BioGRID           | 233494_at     | 204725_s_at  | 0.6337783 |
| ESR1   | STAT3  | 2099  | 6774  | 1 | BioGRID           | 217190_x_at   | 208991_at    | 0.5839479 |
| EZH2   | HDAC1  | 2146  | 3065  | 2 | BioGRID-HPRD      | 203358_s_at   | 201209_at    | 0.6080015 |
| EZH2   | HDAC2  | 2146  | 3066  | 1 | BioGRID           | 203358_s_at   | 201833_at    | 0.6718183 |
| MYC    | SPAG9  | 4609  | 9043  | 1 | HPRD              | 202431_s_at   | 206748_s_at  | 0.5381877 |
| RBBP4  | SIN3A  | 5928  | 25942 | 2 | BioGRID-HPRD      | 217301_x_at   | 225135_at    | 0.5493761 |
| RBBP7  | SIN3A  | 5931  | 25942 | 1 | BioGRID           | 201092_at     | 225135_at    | 0.6468258 |
| MBD2   | SIN3A  | 8932  | 25942 | 1 | BioGRID           | 214397_at     | 238189_at    | 0.4267213 |
| CBX1   | CBX3   | 10951 | 11335 | 2 | BioGRID-HPRD      | 201518_at     | 200037_s_at  | 0.4047979 |
| CBX1   | CBX5   | 10951 | 23468 | 2 | BioGRID-HPRD      | 201518_at     | 209715_at    | 0.6985717 |
| CBX3   | CBX5   | 11335 | 23468 | 2 | BioGRID-HPRD      | 200037_s_at   | 209715_at    | 0.6567468 |

Table S3 Consensus TSLC networks (Nodes)

| label   | type | nb | focality | cc_Loc              | g_family                | probe       | fold change  | index | geneID |
|---------|------|----|----------|---------------------|-------------------------|-------------|--------------|-------|--------|
| ERBB2   | 1    | 7  | 58.25    |                     |                         | 210930_s_at | -0.490105011 | ipa   | 2064   |
| MYC     | 1    | 7  | 57       | Nucleus             | transcription regulator | 244089_at   | -0.478447564 | ipa   | 4609   |
| PRC1    | 1    | 4  | 52.5     | Nucleus             | other                   | 218009_s_at | -0.43201027  | ipa   | 9055   |
| DNMT3A  | 1    | 3  | 46.33333 |                     |                         | 222640_at   | -0.319093984 | focus | 1788   |
| CBX5    | 1    | 3  | 36       | Nucleus             | other                   | 209715_at   | -0.534017606 | ipa   | 23468  |
| RHOA    | 1    | 3  | 24.33333 |                     |                         | 240337_at   | -0.478698961 | ipa   | 387    |
| TGFB1   | 1    | 3  | 24.33333 | Extracellular Space | growth factor           | 203084_at   | -0.590310818 | ipa   | 7040   |
| ESR1    | 1    | 7  | 18.5     |                     |                         | 211233_x_at | -0.722288804 | ipa   | 2099   |
| STAT3   | 1    | 3  | 18.5     |                     |                         | 243213_at   | 0.531044846  | ipa   | 6774   |
| ERBB4   | 1    | 2  | 18.5     |                     |                         | 233498_at   | -0.284633595 | ipa   | 2066   |
| MACF1   | 1    | 2  | 18.5     | Cytoplasm           | other                   | 215222_x_at | 0.374446584  | ipa   | 23499  |
| TNF     | 1    | 2  | 0.5      | Extracellular Space | cytokine                | 207113_s_at | -0.355577155 | ipa   | 7124   |
| HDAC2   | 2    | 8  | 0        | Nucleus             | transcription regulator | 242141_at   | -0.405956984 | ipa   | 3066   |
| HDAC1   | 2    | 8  | 0        | Nucleus             | transcription regulator | 201209_at   | -0.221716938 | ipa   | 3065   |
| SIN3A   | 2    | 8  | 0        | Nucleus             | transcription regulator | 238189_at   | -0.535936661 | ipa   | 25942  |
| BRCA1   | 2    | 6  | 0        |                     |                         | 204531_s_at | -0.191922572 | ipa   | 672    |
| TP53    | 2    | 6  | 0        | Nucleus             | transcription regulator | 201746_at   | -0.571994042 | ipa   | 7157   |
| RBBP4   | 2    | 6  | 0        | Nucleus             | enzyme                  | 244872_at   | 0.626296521  | ipa   | 5928   |
| RBBP7   | 2    | 6  | 0        | Nucleus             | transcription regulator | 201092_at   | 0.233202447  | ipa   | 5931   |
| MBD2    | 2    | 5  | 0        | Nucleus             | transcription regulator | 202485_s_at | -0.315019855 | focus | 8932   |
| PLK1    | 2    | 4  | 0        | Nucleus             | kinase                  | 202240_at   | -0.850044083 | focus | 5347   |
| TIA1    | 2    | 4  | 0        | Nucleus             | other                   | 1554889_at  | 0.726609853  | focus | 7072   |
| HNRNPD  | 2    | 4  | 0        | Nucleus             | transcription regulator | 205183_at   | -0.49328733  | ipa   | 3184   |
| ILF3    | 2    | 4  | 0        | Nucleus             | transcription regulator | 217804_s_at | -0.385495338 | ipa   | 3609   |
| BRCA2   | 2    | 3  | 0        |                     |                         | 208368_s_at | 0.286383076  | ipa   | 675    |
| TIAL1   | 2    | 3  | 0        | Nucleus             | transcription regulator | 217500_at   | -0.733605585 | ipa   | 7073   |
| ELAVL1  | 2    | 3  | 0        |                     |                         | 227746_at   | 0.675569985  | ipa   | 1994   |
| SUDS3   | 2    | 3  | 0        | Nucleus             | other                   | 224974_at   | 0.31989142   | ipa   | 64426  |
| CDKN2A  | 2    | 2  | 0        |                     |                         | 209644_x_at | 0.21253652   | ipa   | 1029   |
| CHEK1   | 2    | 2  | 0        |                     |                         | 205394_at   | -0.289269415 | ipa   | 1111   |
| KIF23   | 2    | 2  | 0        | Cytoplasm           | other                   | 244427_at   | -0.282312247 | ipa   | 9493   |
| EZH2    | 2    | 2  | 0        |                     |                         | 203358_s_at | -0.199232459 | ipa   | 2146   |
| CBX1    | 2    | 2  | 0        | Nucleus             | other                   | 201518_at   | -0.207006629 | ipa   | 10951  |
| CBX3    | 2    | 2  | 0        | Nucleus             | other                   | 1555920_at  | 0.256790796  | ipa   | 11335  |
| GOLGA4  | 3    | 1  | 0        | Cytoplasm           | other                   | 201567_s_at | 0.796419343  | focus | 2803   |
| TRPC6   | 3    | 1  | 0        | Plasma Membrane     | ion channel             | 217287_s_at | -0.275099599 | focus | 7225   |
| F2      | 3    | 1  | 0        |                     |                         | 205754_at   | -0.277487108 | ipa   | 2147   |
| MLANA   | 3    | 1  | 0        |                     |                         | 206426_at   | -0.151041801 | ipa   | 2315   |
| CSNK1E  | 3    | 1  | 0        |                     |                         | 226858_at   | 0.839604727  | lvcom | 1454   |
| ARHGAP5 | 3    | 1  | 0        |                     |                         | 235635_at   | 0.620410459  | focus | 394    |
| DUSP5   | 3    | 1  | 0        |                     |                         | 209457_at   | 0.217890443  | ipa   | 1847   |
| GBP1    | 3    | 1  | 0        | Cytoplasm           | enzyme                  | 231578_at   | 0.156580214  | ipa   | 2633   |
| PMAIP1  | 3    | 1  | 0        | Cytoplasm           | other                   | 204285_s_at | 0.892757243  | focus | 5366   |
| DDIT3   | 3    | 1  | 0        |                     |                         | 209383_at   | 0.235709901  | ipa   | 1649   |
| INHBA   | 3    | 1  | 0        | Extracellular Space | growth factor           | 210511_s_at | 0.386399436  | ipa   | 3624   |
| EED     | 3    | 1  | 0        | Nucleus             | transcription regulator | 210656_at   | 0.293971429  | ipa   | 8726   |
| SILV    | 3    | 1  | 0        | Plasma Membrane     | enzyme                  | 209848_s_at | -0.119821454 | focus | 6490   |
| NCK1    | 3    | 1  | 0        | Cytoplasm           | kinase                  | 204725_s_at | 0.436825922  | focus | 4690   |
| SPAG9   | 3    | 1  | 0        | Plasma Membrane     | other                   | 1554543_at  | 0.635588561  | focus | 9043   |

Table S3 Consensus TSLC networks (Nodes)

| label   | type | nb | focality | cc_Loc              | g_family                | probe       | fold change  | index | geneID |
|---------|------|----|----------|---------------------|-------------------------|-------------|--------------|-------|--------|
| ERBB2   | 1    | 7  | 58.25    |                     |                         | 210930_s_at | -0.490105011 | ipa   | 2064   |
| MYC     | 1    | 7  | 57       | Nucleus             | transcription regulator | 244089_at   | -0.478447564 | ipa   | 4609   |
| PRC1    | 1    | 4  | 52.5     | Nucleus             | other                   | 218009_s_at | -0.43201027  | ipa   | 9055   |
| DNMT3A  | 1    | 3  | 46.33333 |                     |                         | 222640_at   | -0.319093984 | focus | 1788   |
| CBX5    | 1    | 3  | 36       | Nucleus             | other                   | 209715_at   | -0.534017606 | ipa   | 23468  |
| RHOA    | 1    | 3  | 24.33333 |                     |                         | 240337_at   | -0.478698961 | ipa   | 387    |
| TGFB1   | 1    | 3  | 24.33333 | Extracellular Space | growth factor           | 203084_at   | -0.590310818 | ipa   | 7040   |
| ESR1    | 1    | 7  | 18.5     |                     |                         | 211233_x_at | -0.722288804 | ipa   | 2099   |
| STAT3   | 1    | 3  | 18.5     |                     |                         | 243213_at   | 0.531044846  | ipa   | 6774   |
| ERBB4   | 1    | 2  | 18.5     |                     |                         | 233498_at   | -0.284633595 | ipa   | 2066   |
| MACF1   | 1    | 2  | 18.5     | Cytoplasm           | other                   | 215222_x_at | 0.374446584  | ipa   | 23499  |
| TNF     | 1    | 2  | 0.5      | Extracellular Space | cytokine                | 207113_s_at | -0.355577155 | ipa   | 7124   |
| HDAC2   | 2    | 8  | 0        | Nucleus             | transcription regulator | 242141_at   | -0.405956984 | ipa   | 3066   |
| HDAC1   | 2    | 8  | 0        | Nucleus             | transcription regulator | 201209_at   | -0.221716938 | ipa   | 3065   |
| SIN3A   | 2    | 8  | 0        | Nucleus             | transcription regulator | 238189_at   | -0.535936661 | ipa   | 25942  |
| BRCA1   | 2    | 6  | 0        |                     |                         | 204531_s_at | -0.191922572 | ipa   | 672    |
| TP53    | 2    | 6  | 0        | Nucleus             | transcription regulator | 201746_at   | -0.571994042 | ipa   | 7157   |
| RBBP4   | 2    | 6  | 0        | Nucleus             | enzyme                  | 244872_at   | 0.626296521  | ipa   | 5928   |
| RBBP7   | 2    | 6  | 0        | Nucleus             | transcription regulator | 201092_at   | 0.233202447  | ipa   | 5931   |
| MBD2    | 2    | 5  | 0        | Nucleus             | transcription regulator | 202485_s_at | -0.315019855 | focus | 8932   |
| PLK1    | 2    | 4  | 0        | Nucleus             | kinase                  | 202240_at   | -0.850044083 | focus | 5347   |
| TIA1    | 2    | 4  | 0        | Nucleus             | other                   | 1554889_at  | 0.726609853  | focus | 7072   |
| HNRNPD  | 2    | 4  | 0        | Nucleus             | transcription regulator | 205183_at   | -0.49328733  | ipa   | 3184   |
| ILF3    | 2    | 4  | 0        | Nucleus             | transcription regulator | 217804_s_at | -0.385495338 | ipa   | 3609   |
| BRCA2   | 2    | 3  | 0        |                     |                         | 208368_s_at | 0.286383076  | ipa   | 675    |
| TIAL1   | 2    | 3  | 0        | Nucleus             | transcription regulator | 217500_at   | -0.733605585 | ipa   | 7073   |
| ELAVL1  | 2    | 3  | 0        |                     |                         | 227746_at   | 0.675569985  | ipa   | 1994   |
| SUDS3   | 2    | 3  | 0        | Nucleus             | other                   | 224974_at   | 0.31989142   | ipa   | 64426  |
| CDKN2A  | 2    | 2  | 0        |                     |                         | 209644_x_at | 0.21253652   | ipa   | 1029   |
| CHEK1   | 2    | 2  | 0        |                     |                         | 205394_at   | -0.289269415 | ipa   | 1111   |
| KIF23   | 2    | 2  | 0        | Cytoplasm           | other                   | 244427_at   | -0.282312247 | ipa   | 9493   |
| EZH2    | 2    | 2  | 0        |                     |                         | 203358_s_at | -0.199232459 | ipa   | 2146   |
| CBX1    | 2    | 2  | 0        | Nucleus             | other                   | 201518_at   | -0.207006629 | ipa   | 10951  |
| CBX3    | 2    | 2  | 0        | Nucleus             | other                   | 1555920_at  | 0.256790796  | ipa   | 11335  |
| GOLGA4  | 3    | 1  | 0        | Cytoplasm           | other                   | 201567_s_at | 0.796419343  | focus | 2803   |
| TRPC6   | 3    | 1  | 0        | Plasma Membrane     | ion channel             | 217287_s_at | -0.275099599 | focus | 7225   |
| F2      | 3    | 1  | 0        |                     |                         | 205754_at   | -0.277487108 | ipa   | 2147   |
| MLANA   | 3    | 1  | 0        |                     |                         | 206426_at   | -0.151041801 | ipa   | 2315   |
| CSNK1E  | 3    | 1  | 0        |                     |                         | 226858_at   | 0.839604727  | lvcom | 1454   |
| ARHGAP5 | 3    | 1  | 0        |                     |                         | 235635_at   | 0.620410459  | focus | 394    |
| DUSP5   | 3    | 1  | 0        |                     |                         | 209457_at   | 0.217890443  | ipa   | 1847   |
| GBP1    | 3    | 1  | 0        | Cytoplasm           | enzyme                  | 231578_at   | 0.156580214  | ipa   | 2633   |
| PMAIP1  | 3    | 1  | 0        | Cytoplasm           | other                   | 204285_s_at | 0.892757243  | focus | 5366   |
| DDIT3   | 3    | 1  | 0        |                     |                         | 209383_at   | 0.235709901  | ipa   | 1649   |
| INHBA   | 3    | 1  | 0        | Extracellular Space | growth factor           | 210511_s_at | 0.386399436  | ipa   | 3624   |
| EED     | 3    | 1  | 0        | Nucleus             | transcription regulator | 210656_at   | 0.293971429  | ipa   | 8726   |
| SILV    | 3    | 1  | 0        | Plasma Membrane     | enzyme                  | 209848_s_at | -0.119821454 | focus | 6490   |
| NCK1    | 3    | 1  | 0        | Cytoplasm           | kinase                  | 204725_s_at | 0.436825922  | focus | 4690   |
| SPAG9   | 3    | 1  | 0        | Plasma Membrane     | other                   | 1554543_at  | 0.635588561  | focus | 9043   |

Table S4 Lung TSLC Network (Edges)

| gene.a  | gene.b  | geneID.a | geneID.b | #db | database                 | probe.a      | probe.b                     | Correlation |
|---------|---------|----------|----------|-----|--------------------------|--------------|-----------------------------|-------------|
| CD44    | EGFR    | 960      | 1956     | 3   | BioGRID-HPRD-BIND        | 209835_x_at  | 211607_x_at                 | 0.99992185  |
| IFNA2   | SOCS1   | 3440     | 8651     | 1   | IPA.n2                   | 211338_at    | 209999_x_at                 | 0.99849356  |
| CTNNB1  | ILF3    | 1499     | 3609     | 1   | IPA.n3                   | 223679_at    | 211375_s_at                 | 0.99761243  |
| EGFR    | STAT1   | 1956     | 6772     | 2   | BioGRID-HPRD             | 201983_s_at  | AFFX-HUMISGF3A/M97935_MB_at | 0.99718719  |
| EP300   | SMAD1   | 2033     | 4086     | 2   | BioGRID-HPRD             | 202221_s_at  | 227798_at                   | 0.9966831   |
| EGFR    | SHC1    | 1956     | 6464     | 4   | BioGRID-BIND-HPRD-IPA.n1 | 211607_x_at  | 214853_s_at                 | 0.9946332   |
| E2F1    | TP73    | 1869     | 7161     | 1   | IPA.n2                   | 204947_at    | 232546_at                   | 0.99436015  |
| EGFR    | VAV3    | 1956     | 10451    | 2   | BioGRID-HPRD             | 211550_at    | 224221_s_at                 | 0.99282514  |
| EGFR    | ERBB2   | 1956     | 2064     | 4   | BioGRID-HPRD-BIND-IPA.n3 | 201984_s_at  | 210930_s_at                 | 0.99276028  |
| IRS1    | SHC1    | 3667     | 6464     | 3   | BioGRID-HPRD-BIND        | 204686_at    | 214853_s_at                 | 0.99262096  |
| CREBBP  | TP53    | 1387     | 7157     | 4   | BioGRID-HPRD-BIND-IPA.n1 | 228177_at    | 201746_at                   | 0.99193726  |
| CREBBP  | STAT1   | 1387     | 6772     | 4   | BioGRID-HPRD-BIND-IPA.n1 | 211808_s_at  | AFFX-HUMISGF3A/M97935_MB_at | 0.99141449  |
| CD44    | CSF1    | 960      | 1435     | 1   | IPA.n3                   | 229221_at    | 209716_at                   | 0.99110969  |
| SHC1    | VAV3    | 6464     | 10451    | 2   | BioGRID-HPRD             | 201469_s_at  | 218806_s_at                 | 0.99051204  |
| CDC2    | E2F1    | 983      | 1869     | 1   | BIND                     | 203213_at    | 204947_at                   | 0.98959017  |
| BIRC5   | CDC2    | 332      | 983      | 2   | HPRD-IPA.n1              | 210334_x_at  | 231534_at                   | 0.98938474  |
| STX16   | STX6    | 8675     | 10228    | 2   | HPRD-IPA.n4              | 218822_s_at  | 212800_at                   | 0.98818302  |
| CDC2    | TP73    | 983      | 7161     | 1   | IPA.n2                   | 203213_at    | 232546_at                   | 0.98695704  |
| CD44    | ERBB2   | 960      | 2064     | 2   | BioGRID-IPA.n3           | 212063_at    | 210930_s_at                 | 0.9862118   |
| VAMP3   | STX6    | 9341     | 10228    | 2   | BioGRID-IPA.n1           | 201337_s_at  | 212800_at                   | 0.98527358  |
| KPNA2   | RECQL   | 3838     | 5965     | 2   | BioGRID-HPRD             | 201088_at    | 212917_x_at                 | 0.98448425  |
| TGFB1   | TIMP1   | 7040     | 7076     | 1   | IPA.n2                   | 203085_s_at  | 201666_at                   | 0.98401838  |
| IFNG    | TP73    | 3458     | 7161     | 1   | IPA.n2                   | 210354_at    | 1554379_a_at                | 0.98301829  |
| EP300   | TP73    | 2033     | 7161     | 1   | BIND                     | 202221_s_at  | 232546_at                   | 0.98230869  |
| GRB2    | RACGAP1 | 2885     | 29127    | 1   | BioGRID                  | 228572_at    | 224272_at                   | 0.98202449  |
| ERBB2   | SHC1    | 2064     | 6464     | 2   | BioGRID-HPRD             | 210930_s_at  | 214853_s_at                 | 0.98054627  |
| RECQL   | MLH1    | 5965     | 4292     | 1   | IPA.n1                   | 210568_s_at  | 202520_s_at                 | 0.98049163  |
| CSF1    | SOCS1   | 1435     | 8651     | 1   | HPRD                     | 211839_s_at  | 213337_s_at                 | 0.98001357  |
| EP300   | TBP     | 2033     | 6908     | 1   | BIND                     | 202221_s_at  | 203135_at                   | 0.97978613  |
| E2F1    | MAPK1   | 1869     | 5594     | 1   | IPA.n1                   | 204947_at    | 224621_at                   | 0.97964449  |
| DNMT1   | E2F1    | 1786     | 1869     | 1   | BioGRID                  | 201697_s_at  | 204947_at                   | 0.97960639  |
| GRB2    | VAV3    | 2885     | 10451    | 2   | BioGRID-HPRD             | 215075_s_at  | 218807_at                   | 0.97935493  |
| ERBB4   | GRB2    | 2066     | 2885     | 1   | BioGRID                  | 206794_at    | 215075_s_at                 | 0.97928233  |
| BIRC5   | E2F1    | 332      | 1869     | 3   | BIND-IPA.n1              | 202095_s_at  | 2028_s_at                   | 0.97856914  |
| MAPK1   | RB1     | 5594     | 5925     | 1   | BIND                     | 208351_s_at  | 211540_s_at                 | 0.97828946  |
| CD44    | ERBB4   | 960      | 2066     | 2   | BioGRID-HPRD             | 229221_at    | 206794_at                   | 0.97815941  |
| VAMP3   | VT1A    | 9341     | 143187   | 2   | BioGRID-IPA.n1           | 201337_s_at  | 235923_at                   | 0.977110459 |
| CREBBP  | SMAD1   | 1387     | 4086     | 1   | BioGRID                  | 202160_at    | 210993_s_at                 | 0.97692954  |
| SP1     | STAT1   | 6667     | 6772     | 1   | IPA.n1                   | 214732_at    | AFFX-HUMISGF3A/M97935_5_at  | 0.97543318  |
| SHC1    | SP1     | 6464     | 6667     | 1   | HPRD                     | 201469_s_at  | 214732_at                   | 0.97286578  |
| TP53    | XPC     | 7157     | 7508     | 1   | IPA.n1                   | 201746_at    | 209375_at                   | 0.97036456  |
| ESR1    | PIAS1   | 2099     | 8554     | 2   | HPRD-BIND                | 211234_x_at  | 217864_s_at                 | 0.96791505  |
| MSH6    | MSH2    | 2956     | 4436     | 4   | BioGRID-HPRD-BIND-IPA.n1 | 202911_at    | 209421_at                   | 0.96719338  |
| VAMP4   | STX16   | 8674     | 8675     | 3   | BioGRID-HPRD-IPA.n4      | 213480_at    | 221500_s_at                 | 0.96490985  |
| ERBB4   | SHC1    | 2066     | 6464     | 1   | BioGRID                  | 206794_at    | 214853_s_at                 | 0.96459712  |
| ESR1    | MAPK1   | 2099     | 5594     | 2   | BioGRID-HPRD             | 211627_x_at  | 224620_at                   | 0.96401021  |
| GRLF1   | RASA1   | 2909     | 5921     | 1   | BioGRID                  | 202046_s_at  | 210621_s_at                 | 0.96388052  |
| TGFB1   | ID1     | 7040     | 3397     | 1   | IPA.n2                   | 203085_s_at  | 208937_s_at                 | 0.96349901  |
| COL18A1 | MAPK1   | 80781    | 5594     | 1   | IPA.n1                   | 209081_s_at  | 224620_at                   | 0.96295819  |
| STX16   | VAMP3   | 8675     | 9341     | 3   | BioGRID-HPRD-IPA.n4      | 218822_s_at  | 201337_s_at                 | 0.96178359  |
| ESR1    | TERT    | 2099     | 7015     | 1   | IPA.n1                   | 211234_x_at  | 1555271_a_at                | 0.96090159  |
| TAF5    | TAF11   | 6877     | 6882     | 3   | BioGRID-HPRD-IPA.n4      | 210053_at    | 1558136_s_at                | 0.96034622  |
| DDX20   | GEMIN4  | 11218    | 50628    | 2   | BioGRID-IPA.n1           | 223331_s_at  | 217099_s_at                 | 0.95930209  |
| GRB2    | GRLF1   | 2885     | 2909     | 1   | BioGRID                  | 215075_s_at  | 229397_s_at                 | 0.95916294  |
| MLL2    | ESR1    | 8085     | 2099     | 1   | IPA.n1                   | 216382_s_at  | 211233_x_at                 | 0.95884696  |
| MBD2    | ESR1    | 8932     | 2099     | 1   | IPA.n1                   | 202485_s_at  | 211233_x_at                 | 0.95874665  |
| CFTR    | CLCN3   | 1080     | 1182     | 1   | BioGRID                  | 215703_at    | 201733_at                   | 0.95734999  |
| GRB2    | IRS1    | 2885     | 3667     | 3   | BioGRID-HPRD-IPA.n1      | 215075_s_at  | 204686_at                   | 0.95622984  |
| SOCS1   | CXCL2   | 8651     | 2920     | 1   | IPA.n2                   | 213337_s_at  | 209774_x_at                 | 0.95582855  |
| TXN     | ESR1    | 7295     | 2099     | 1   | IPA.n1                   | 208864_s_at  | 211627_x_at                 | 0.95335455  |
| COL18A1 | STAT1   | 80781    | 6772     | 1   | IPA.n1                   | 209082_s_at  | AFFX-HUMISGF3A/M97935_MB_at | 0.95236669  |
| TXN     | CASP9   | 7295     | 842      | 1   | IPA.n1                   | 216609_at    | 210775_x_at                 | 0.95194107  |
| CREBBP  | MBD2    | 1387     | 8932     | 1   | HPRD                     | 211808_s_at  | 202484_s_at                 | 0.95029479  |
| TAF11   | TBP     | 6882     | 6908     | 2   | BioGRID-HPRD             | 1558136_s_at | 203135_at                   | 0.95017968  |
| IL27    | CXCL10  | 246778   | 3627     | 1   | IPA.n2                   | 1552995_at   | 204533_at                   | 0.95004652  |
| RB1     | CBX5    | 5925     | 23468    | 1   | BioGRID                  | 211540_s_at  | 234990_at                   | 0.94895941  |
| TAF5    | TBP     | 6877     | 6908     | 2   | BioGRID-HPRD             | 210053_at    | 203135_at                   | 0.94815388  |
| EGFR    | SOCS1   | 1956     | 8651     | 2   | BioGRID-HPRD             | 210984_x_at  | 213337_s_at                 | 0.94715926  |
| EP300   | TWIST1  | 2033     | 7291     | 2   | BioGRID-HPRD             | 202221_s_at  | 213943_at                   | 0.9453108   |
| CSF1    | GRB2    | 1435     | 2885     | 1   | IPA.n3                   | 209716_at    | 215075_s_at                 | 0.94002163  |
| RB1     | SP1     | 5925     | 6667     | 3   | BioGRID-HPRD-IPA.n1      | 211540_s_at  | 214732_at                   | 0.93488739  |
| CREBBP  | STAT6   | 1387     | 6778     | 2   | BioGRID-HPRD             | 211808_s_at  | 201331_s_at                 | 0.93464983  |
| INSR    | SHC1    | 3643     | 6464     | 4   | BioGRID-BIND-HPRD-IPA.n3 | 226450_at    | 217048_at                   | 0.93142407  |
| EGFR    | ESR1    | 1956     | 2099     | 2   | BioGRID-HPRD             | 211551_at    | 211627_x_at                 | 0.93062295  |

|        |          |        |        |   |                               |                       |              |             |
|--------|----------|--------|--------|---|-------------------------------|-----------------------|--------------|-------------|
| GRB2   | CD44     | 2885   | 960    | 1 | IPA.n3                        | 215075_s_at           | 210916_s_at  | 0.93057158  |
| E2F1   | MSH2     | 1869   | 4436   | 2 | BIND-IPA.n1                   | 204947_at             | 209421_at    | 0.92812721  |
| CREBBP | BIRC5    | 1387   | 332    | 2 | IPA.n1月2日                     | 235858_at             | 202094_at    | 0.92801297  |
| IFNB1  | SERPINA1 | 3456   | 5265   | 1 | IPA.n3                        | 208173_at             | 211428_at    | 0.92552906  |
| SP1    | CHRNA3   | 6667   | 1136   | 1 | IPA.n1                        | 224754_at             | 211587_x_at  | 0.92384532  |
| EGFR   | GRB2     | 1956   | 2885   | 4 | BioGRID-BIND-HPRD-IPA.n3      | 201983_s_at           | 215075_s_at  | 0.92371344  |
| GRB2   | SHC1     | 2885   | 6464   | 4 | BioGRID-BIND-HPRD-IPA.n3      | 215075_s_at           | 214853_s_at  | 0.92282236  |
| CREBBP | HNF1A    | 1387   | 6927   | 3 | BioGRID-HPRD-BIND             | 211808_s_at           | 210515_at    | 0.92246709  |
| DDX6   | EIF2C2   | 1656   | 27161  | 1 | IPA.n4                        | 225549_at             | 225569_at    | 0.91570674  |
| TNF    | SOCS1    | 7124   | 8651   | 1 | IPA.n2                        | 207113_s_at           | 209999_x_at  | 0.91526933  |
| GRB2   | ADAM12   | 2885   | 8038   | 1 | HPRD                          | 228572_at             | 204943_at    | 0.91470651  |
| STX16  | VT11A    | 8675   | 143187 | 2 | HPRD-IPA.nIPA.n4              | 218822_s_at           | 235923_at    | 0.91419594  |
| CFTR   | SLC9A3R1 | 1080   | 9368   | 4 | BioGRID-HPRD-BIND-IPA.n4      | 205043_at             | 201349_at    | 0.9139189   |
| GRB2   | SOCS1    | 2885   | 8651   | 3 | BioGRID-HPRD-BIND             | 228572_at             | 209999_x_at  | 0.91320869  |
| DDX20  | EIF2C2   | 11218  | 27161  | 3 | BioGRID-HPRD-IPA.n4           | 223331_s_at           | 225569_at    | 0.91156212  |
| GRB2   | INSR     | 2885   | 3643   | 2 | BioGRID-IPA.nIPA.n3           | 228572_at             | 226450_at    | 0.9113859   |
| IFNG   | SREBF2   | 3458   | 6721   | 1 | IPA.n2                        | 210354_at             | 201247_at    | 0.90869244  |
| EIF2C2 | GEMIN4   | 27161  | 50628  | 2 | BioGRID-IPA.n4                | 225569_at             | 217099_s_at  | 0.90837564  |
| CREBBP | ESR1     | 1387   | 2099   | 2 | BioGRID-IPA.n1                | 235858_at             | 217190_x_at  | 0.90757023  |
| EGFR   | RASA1    | 1956   | 5921   | 3 | BioGRID-HPRD-BIND             | 201983_s_at           | 210621_s_at  | 0.90572326  |
| ESR1   | ERBB4    | 2099   | 2066   | 1 | IPA.n1                        | 211627_x_at           | 206794_at    | 0.90477497  |
| CFTR   | STX1A    | 1080   | 6804   | 4 | BioGRID-HPRD-BIND-IPA.nIPA.n4 | 234706_x_at           | 204729_s_at  | 0.90474984  |
| ESR1   | SHC1     | 2099   | 6464   | 2 | BioGRID-HPRD                  | 211235_s_at           | 217048_at    | 0.9029758   |
| SP1    | ESR1     | 6667   | 2099   | 1 | IPA.n1                        | 224754_at             | 211233_x_at  | 0.90224676  |
| VAMP3  | STX1A    | 9341   | 6804   | 1 | IPA.n4                        | 201337_s_at           | 204729_s_at  | 0.89942194  |
| EIF2C2 | TNRC6A   | 27161  | 27327  | 2 | BioGRID-IPA.n4                | 213310_at             | 1553346_a_at | 0.89908096  |
| ERBB2  | ERBB4    | 2064   | 2066   | 1 | BioGRID                       | 210930_s_at           | 206794_at    | 0.89779145  |
| BTG2   | CNOT8    | 7832   | 9337   | 2 | BioGRID-HPRD                  | 201235_s_at           | 202162_s_at  | 0.89766634  |
| IL21   | SOCS1    | 59067  | 8651   | 1 | IPA.n2                        | 221271_at             | 209999_x_at  | 0.89413839  |
| STAT1  | PIAS1    | 6772   | 8554   | 3 | BioGRID-HPRD-IPA.nIPA.n1      | AFFX-HUMISGF217862_at |              | 0.89305307  |
| IRS1   | SOCS1    | 3667   | 8651   | 2 | BioGRID-HPRD                  | 204686_at             | 213337_s_at  | 0.88625226  |
| PDGFRB | SOCS1    | 5159   | 8651   | 1 | BIND                          | 202273_at             | 210000_s_at  | 0.88426858  |
| BIRC5  | TP73     | 332    | 7161   | 1 | IPA.n2                        | 202095_s_at           | 232546_at    | 0.87922305  |
| EP300  | BIRC5    | 2033   | 332    | 1 | IPA.n1                        | 202221_s_at           | 202095_s_at  | 0.87318735  |
| INSR   | MAPK1    | 3643   | 5594   | 1 | BioGRID                       | 207851_s_at           | 224621_at    | 0.87184012  |
| INSR   | SOCS1    | 3643   | 8651   | 1 | BIND                          | 226450_at             | 209999_x_at  | 0.87054663  |
| DNMT1  | BIRC5    | 1786   | 332    | 1 | IPA.n1                        | 201697_s_at           | 202095_s_at  | 0.87009235  |
| TERF2  | H2AFX    | 7014   | 3014   | 1 | IPA.n1                        | 1555185_x_at          | 212524_x_at  | 0.86685461  |
| SP1    | MSH6     | 6667   | 2956   | 1 | IPA.n1                        | 224754_at             | 211449_at    | 0.86344667  |
| GRB2   | RASA1    | 2885   | 5921   | 2 | BioGRID-HPRD                  | 215075_s_at           | 210621_s_at  | 0.86060807  |
| RECQL  | MSH2     | 5965   | 4436   | 1 | IPA.n1                        | 212918_at             | 209421_at    | 0.86033785  |
| TNF    | CXCL2    | 7124   | 2920   | 1 | IPA.n2                        | 207113_s_at           | 230101_at    | 0.85869582  |
| TAF13  | CPSF1    | 6884   | 29894  | 1 | IPA.n4                        | 205966_at             | 201638_s_at  | 0.85782377  |
| GHRL   | STAR     | 51738  | 6770   | 1 | IPA.n4                        | 237647_at             | 204548_at    | 0.85541653  |
| IL27   | SOCS1    | 246778 | 8651   | 1 | IPA.n2                        | 1552995_at            | 209999_x_at  | 0.85422625  |
| MED29  | MED11    | 55588  | 400569 | 3 | BioGRID-HPRD-IPA.n4           | 225708_at             | 226958_s_at  | 0.85299997  |
| VAMP4  | VT11A    | 8674   | 143187 | 2 | BioGRID-IPA.nIPA.n4           | 213480_at             | 1552536_at   | 0.85051308  |
| SP1    | SREBF2   | 6667   | 6721   | 2 | BioGRID-HPRD                  | 1553685_s_at          | 201248_s_at  | 0.84864892  |
| TP53   | MSH6     | 7157   | 2956   | 1 | IPA.n1                        | 201746_at             | 211450_s_at  | 0.84699558  |
| IL21   | CXCL10   | 59067  | 3627   | 1 | IPA.n2                        | 221271_at             | 204533_at    | 0.84685918  |
| MAPK1  | TP53     | 5594   | 7157   | 2 | BioGRID-IPA.nIPA.n1           | 212271_at             | 201746_at    | 0.84399718  |
| CFTR   | UBQLN1   | 1080   | 29979  | 1 | IPA.n4                        | 234702_x_at           | 222991_s_at  | 0.83859762  |
| TERT   | H2AFX    | 7015   | 3014   | 1 | IPA.n1                        | 207199_at             | 205436_s_at  | 0.83462337  |
| ERBB2  | GRB2     | 2064   | 2885   | 3 | BioGRID-HPRD-IPA.nIPA.n3      | 210930_s_at           | 215075_s_at  | 0.83391447  |
| KPNA2  | PMS2     | 3838   | 5395   | 1 | IPA.n4                        | 201088_at             | 216039_at    | 0.82969324  |
| CPSF1  | SRRM1    | 29894  | 10250  | 1 | IPA.n4                        | 201639_s_at           | 201224_s_at  | 0.82859094  |
| EP300  | TP53     | 2033   | 7157   | 4 | BioGRID-HPRD-BIND-IPA.n1      | 213579_s_at           | 201746_at    | 0.82832229  |
| E2F1   | CBX5     | 1869   | 23468  | 1 | BIND                          | 2028_s_at             | 242069_at    | 0.82800423  |
| TAF11  | CPSF1    | 6882   | 29894  | 1 | IPA.n4                        | 1558136_s_at          | 33132_at     | 0.82769656  |
| STAT6  | SOCS1    | 6778   | 8651   | 1 | IPA.n2                        | 201331_s_at           | 213337_s_at  | 0.82678845  |
| IFNG   | CCL4     | 3458   | 6351   | 1 | IPA.n2                        | 210354_at             | 204103_at    | 0.82448473  |
| CREBBP | E2F1     | 1387   | 1869   | 1 | BioGRID                       | 202160_at             | 204947_at    | 0.82345875  |
| ECT2   | RACGAP1  | 1894   | 29127  | 1 | IPA.n4                        | 237241_at             | 224272_at    | 0.82237249  |
| CSF1   | TNF      | 1435   | 7124   | 1 | HPRD                          | 207082_at             | 207113_s_at  | 0.82208815  |
| MLL2   | PPP2R2B  | 8085   | 5521   | 1 | IPA.n1                        | 216382_s_at           | 205643_s_at  | 0.81663086  |
| HNF1A  | SERPINA1 | 6927   | 5265   | 1 | IPA.n3                        | 210515_at             | 211429_s_at  | 0.81470722  |
| CLCN3  | SLC9A3R1 | 1182   | 9368   | 2 | BioGRID-HPRD                  | 201734_at             | 201349_at    | -0.81366656 |
| TAF11  | TAF13    | 6882   | 6884   | 2 | BioGRID-HPRD                  | 1558136_s_at          | 205966_at    | -0.81956655 |
| E2F1   | MLH1     | 1869   | 4292   | 1 | BIND                          | 204947_at             | 202520_s_at  | -0.8543077  |
| IFNG   | RASA1    | 3458   | 5921   | 1 | IPA.n2                        | 210354_at             | 210621_s_at  | -0.8553362  |

Table S5 Lung TSLC Networks (Nodes)

| label    | type | nbhood | focality  | differential | probe         | fold change  | lv_consistent | lung TSLC    | GeneID | g_family                          |
|----------|------|--------|-----------|--------------|---------------|--------------|---------------|--------------|--------|-----------------------------------|
| TBP      | 1    | 3      | 160       | .            | 203135_at     | 0.287551383  | .             | 0.751982744  | 6908   | transcription regulator           |
| EP300    | 1    | 6      | 146.66667 | .            | 202221_s_at   | 0.282407087  | .             | 0.673816365  | 2033   | transcription regulator           |
| ESR1     | 1    | 11     | 112.5     | .            | 215551_at     | 0.082793858  | .             | 0.79818623   | 2099   | ligand-dependent nuclear receptor |
| CREBBP   | 1    | 9      | 99        | .            | 211808_s_at   | 0.095624117  | .             | -0.205538151 | 1387   | transcription regulator           |
| TAF11    | 1    | 4      | 99        | .            | 1558135_at    | 0.431290153  | .             | 1.093414667  | 6882   | transcription regulator           |
| SOCS1    | 1    | 12     | 81.75     | lg           | 209999_x_at   | -0.068025032 | lung          | 0.313288221  | 8651   | other                             |
| RECQL    | 1    | 3      | 67        | atrt         | 205091_x_at   | 0.322937656  | lung oral     | -0.595630799 | 5965   | enzyme                            |
| TERT     | 1    | 2      | 67        | .            | 1555271_a_at  | -0.019871004 | .             | -0.015934492 | 7015   | enzyme                            |
| HNF1A    | 1    | 2      | 67        | .            | 210515_at     | -0.435404285 | .             | -0.939153104 | 6927   | transcription regulator           |
| GRB2     | 1    | 14     | 66.666667 | snail        | 228572_at     | 0.017253845  | lung breast   | -0.290755352 | 2885   | other                             |
| SP1      | 1    | 7      | 34        | .            | 224754_at     | 0.514171963  | .             | 0.710598752  | 6667   | transcription regulator           |
| TP53     | 1    | 5      | 34        | .            | 211300_s_at   | -0.498483886 | .             | -0.225716066 | 7157   | transcription regulator           |
| IFNG     | 1    | 4      | 34        | .            | 210354_at     | -0.125111301 | .             | 0.724220169  | 3458   | cytokine                          |
| CPSF1    | 1    | 3      | 34        | atrt         | 201639_s_at   | 0.065009507  | lung          | 0.81583748   | 29894  | other                             |
| KPNA2    | 1    | 2      | 34        | .            | 211762_s_at   | -0.450958331 | .             | -0.703640227 | 3838   | transporter                       |
| MLL2     | 1    | 2      | 34        | .            | 227528_s_at   | 0.142852089  | .             | 0.712940053  | 8085   | transcription regulator           |
| TXN      | 1    | 2      | 34        | atrt         | 216609_at     | 0.04757852   | lung          | -0.867565811 | 7295   | enzyme                            |
| RACGAP1  | 1    | 2      | 34        | .            | 224272_at     | -0.110018616 | .             | 0.027009864  | 29127  | transporter                       |
| SERPINA1 | 1    | 2      | 34        | lg           | 211429_s_at   | -0.08768584  | lung          | -0.23603667  | 5265   | other                             |
| H2AFX    | 1    | 2      | 34        | atrt         | 212524_x_at   | -0.371707372 | lung gbm      | -0.416433395 | 3014   | other                             |
| VAMP3    | 1    | 4      | 10        | .            | 201336_at     | 0.09012197   | .             | -0.440880923 | 9341   | other                             |
| STX1A    | 1    | 2      | 10        | .            | 204729_s_at   | -0.145838616 | .             | -0.652136806 | 6804   | transporter                       |
| CFTR     | 1    | 4      | 6.666667  | com          | 234702_x_at   | -0.099860319 | lung          | -0.274374578 | 1080   | ion channel                       |
| EIF2C2   | 1    | 4      | 1.666667  | atrt         | 225827_at     | 0.29091523   | lung breast   | 0.432941238  | 27161  | translation regulator             |
| TGFB1    | 1    | 2      | 0.5       | .            | 203085_s_at   | 0.130741505  | .             | -0.439950196 | 7040   | growth factor                     |
| EGFR     | 2    | 9      | 0         | .            | 211607_x_at   | 0.4171874    | .             | -0.367135472 | 1956   | kinase                            |
| E2F1     | 2    | 9      | 0         | .            | 204947_at     | -0.457846103 | .             | 0.354955467  | 1869   | transcription regulator           |
| SHC1     | 2    | 9      | 0         | .            | 214853_s_at   | -0.052429192 | .             | -1.815286673 | 6464   | other                             |
| BIRC5    | 2    | 6      | 0         | cn           | 210334_x_at   | -0.215221928 | lung atrt     | 0.761308573  | 332    | other                             |
| MAPK1    | 2    | 6      | 0         | lg           | 1552263_at    | 0.355761603  | lung breast   | 0.964369891  | 5594   | kinase                            |
| CD44     | 2    | 5      | 0         | .            | 216056_at     | 0.3155394    | .             | -0.151870383 | 960    | other                             |
| ERBB2    | 2    | 5      | 0         | .            | 234354_x_at   | 0.199512996  | .             | -0.536039887 | 2064   | kinase                            |
| ERBB4    | 2    | 5      | 0         | atrt         | 206794_at     | -0.035414519 | lung          | 0.304146378  | 2066   | kinase                            |
| STAT1    | 2    | 5      | 0         | .            | AFFX-HUMISGF: | 0.110893384  | .             | -1.1188445   | 6772   | transcription regulator           |
| TP73     | 2    | 5      | 0         | .            | 220804_s_at   | -0.18490816  | .             | 0.30353359   | 7161   | transcription regulator           |
| STX16    | 2    | 4      | 0         | atrt         | 221499_s_at   | 0.64421139   | lung oral     | 1.327248307  | 8675   | transporter                       |
| CSF1     | 2    | 4      | 0         | .            | 210557_x_at   | -0.179010437 | .             | 0.225362698  | 1435   | cytokine                          |
| INSR     | 2    | 4      | 0         | atrt         | 226212_s_at   | 0.145780843  | lung breast   | 1.455602753  | 3643   | kinase                            |
| RASA1    | 2    | 4      | 0         | .            | 210621_s_at   | 0.405472456  | .             | -0.484458084 | 5921   | transporter                       |
| IRS1     | 2    | 3      | 0         | .            | 235392_at     | -0.485334283 | .             | -1.470380998 | 3667   | other                             |
| CDC2     | 2    | 3      | 0         | .            | 203214_x_at   | 0.024535323  | .             | 0.120586658  | 983    | kinase                            |
| MSH6     | 2    | 3      | 0         | .            | 202911_at     | 0.298259263  | .             | 0.256678316  | 2956   | enzyme                            |
| RB1      | 2    | 3      | 0         | .            | 203132_at     | -0.065657187 | .             | -0.166067585 | 5925   | transcription regulator           |
| TNF      | 2    | 3      | 0         | .            | 207113_s_at   | -0.355577155 | .             | -0.332414373 | 7124   | cytokine                          |
| VAV3     | 2    | 3      | 0         | atrt         | 224221_s_at   | 0.190483744  | lung          | -0.728003029 | 10451  | .                                 |
| VT11A    | 2    | 3      | 0         | .            | 242356_at     | 0.306646617  | .             | -0.03940389  | 143187 | transporter                       |

|          |   |   |   |       |              |                              |              |        |                         |
|----------|---|---|---|-------|--------------|------------------------------|--------------|--------|-------------------------|
| MSH2     | 2 | 3 | 0 | .     | 209421_at    | 0.209219727 .                | 0.404763487  | 4436   | enzyme                  |
| DNMT1    | 2 | 2 | 0 | .     | 201697_s_at  | -0.159234577 .               | 0.628881119  | 1786   | enzyme                  |
| VAMP4    | 2 | 2 | 0 | .     | 213480_at    | 0.693971537 .                | 0.656799858  | 8674   | other                   |
| GRLF1    | 2 | 2 | 0 | atrt  | 202044_at    | 0.231780126 lung             | 0.378941853  | 2909   | .                       |
| COL18A1  | 2 | 2 | 0 | .     | 209081_s_at  | -0.037841289 .               | -0.015347705 | 80781  | other                   |
| TAF5     | 2 | 2 | 0 | .     | 1553528_a_at | 0.373159183 .                | 0.928668627  | 6877   | transcription regulator |
| DDX20    | 2 | 2 | 0 | .     | 223331_s_at  | 0.57211895 .                 | 1.281605094  | 11218  | transcription regulator |
| MBD2     | 2 | 2 | 0 | x     | 202484_s_at  | 0.042601088 lung             | -0.342293952 | 8932   | transcription regulator |
| IL27     | 2 | 2 | 0 | .     | 1552995_at   | 0.039994132 .                | 0.260998785  | 246778 | cytokine                |
| IL21     | 2 | 2 | 0 | .     | 221271_at    | -0.085991563 .               | -0.521787528 | 59067  | cytokine                |
| TAF13    | 2 | 2 | 0 | .     | 205966_at    | 0.043564356 .                | 0.311303517  | 6884   | transcription regulator |
| STAT6    | 2 | 2 | 0 | .     | 201331_s_at  | -0.04032854 .                | -1.193813016 | 6778   | transcription regulator |
| CLCN3    | 2 | 2 | 0 | atrt  | 201732_s_at  | 0.333145835 lung             | 0.866803302  | 1182   | .                       |
| SMAD1    | 2 | 2 | 0 | .     | 208015_at    | 0.261755793 .                | 0.39769438   | 4086   | transcription regulator |
| STX6     | 2 | 2 | 0 | .     | 212799_at    | 0.379527108 .                | 0.179865143  | 10228  | transporter             |
| MLH1     | 2 | 2 | 0 | .     | 202520_s_at  | -0.769251726 .               | -3.099259205 | 4292   | other                   |
| PIAS1    | 2 | 2 | 0 | gbm   | 217864_s_at  | 0.616761964 lung oral        | 0.231453479  | 8554   | transcription regulator |
| GEMIN4   | 2 | 2 | 0 | .     | 205527_s_at  | -0.132285795 .               | -0.438877171 | 50628  | other                   |
| CXCL2    | 2 | 2 | 0 | .     | 230101_at    | 0.656182494 .                | -0.465924854 | 2920   | cytokine                |
| CXCL10   | 2 | 2 | 0 | .     | 204533_at    | -0.311816102 .               | -0.099371367 | 3627   | cytokine                |
| CBX5     | 2 | 2 | 0 | atrt  | 234990_at    | 0.176982516 lung             | 0.705592144  | 23468  | other                   |
| SLC9A3R1 | 2 | 2 | 0 | .     | 201349_at    | -0.868383063 .               | -1.083493046 | 9368   | other                   |
| SREBF2   | 2 | 2 | 0 | atrt  | 201247_at    | 0.656182494 lung breast      | 1.626923677  | 6721   | transcription regulator |
| IFNA2    | 3 | 1 | 0 | .     | 211338_at    | -0.191180578 .               | -0.1392019   | 3440   | cytokine                |
| CTNNB1   | 3 | 1 | 0 | .     | 223679_at    | 0.704111852 .                | 0.587887538  | 1499   | transcription regulator |
| IFNB1    | 3 | 1 | 0 | .     | 208173_at    | -0.122798696 .               | 0.026418054  | 3456   | cytokine                |
| DDX6     | 3 | 1 | 0 | .     | 225549_at    | 0.34485676 .                 | 0.093643646  | 1656   | enzyme                  |
| BTG2     | 3 | 1 | 0 | atrt  | 201236_s_at  | 0.031756844 lung             | 1.585993018  | 7832   | transcription regulator |
| PDGFRB   | 3 | 1 | 0 | .     | 202273_at    | -0.117418755 .               | -0.32643221  | 5159   | kinase                  |
| TERF2    | 3 | 1 | 0 | .     | 203611_at    | 0.276757941 .                | 0.076128238  | 7014   | other                   |
| GHRL     | 3 | 1 | 0 | .     | 237647_at    | -0.274866229 .               | -0.356782491 | 51738  | growth factor           |
| MED29    | 3 | 1 | 0 | .     | 225708_at    | -0.003782209 .               | -0.601559932 | 55588  | other                   |
| ECT2     | 3 | 1 | 0 | atrt  | 219787_s_at  | 0.175607613 lung oral breast | -0.78155886  | 1894   | other                   |
| ILF3     | 3 | 1 | 0 | sf    | 217805_at    | 0.224484872 lung colon       | 1.506583555  | 3609   | transcription regulator |
| TIMP1    | 3 | 1 | 0 | .     | 201666_at    | 0.129941232 .                | -0.161337911 | 7076   | other                   |
| XPC      | 3 | 1 | 0 | .     | 209375_at    | 0.089357493 .                | 0.23955464   | 7508   | other                   |
| ID1      | 3 | 1 | 0 | .     | 208937_s_at  | -0.631796535 .               | -1.036089956 | 3397   | transcription regulator |
| CASP9    | 3 | 1 | 0 | .     | 240437_at    | 0.056179734 .                | -0.167397365 | 842    | peptidase               |
| TWIST1   | 3 | 1 | 0 | atrt  | 213943_at    | 0.319560235 lung             | 0.787541331  | 7291   | transcription regulator |
| CHRNA3   | 3 | 1 | 0 | atrt  | 211772_x_at  | 0.192560906 lung breast      | 1.60784574   | 1136   | transmembrane receptor  |
| ADAM12   | 3 | 1 | 0 | atrt  | 202952_s_at  | 0.124916753 lung             | -0.720607756 | 8038   | .                       |
| TNRC6A   | 3 | 1 | 0 | .     | 224705_s_at  | 0.350274687 .                | -0.466245722 | 27327  | other                   |
| CNOT8    | 3 | 1 | 0 | atrt  | 202163_s_at  | 0.247264458 lung             | 0.361100008  | 9337   | .                       |
| STAR     | 3 | 1 | 0 | x     | 204548_at    | -0.171699229 lung breast     | -0.26826546  | 6770   | transporter             |
| MED11    | 3 | 1 | 0 | atrt  | 226958_s_at  | -0.558713911 lung breast gbn | -1.648572839 | 400569 | other                   |
| UBQLN1   | 3 | 1 | 0 | .     | 222990_at    | 0.587309974 .                | -0.244566855 | 29979  | other                   |
| PMS2     | 3 | 1 | 0 | .     | 209805_at    | 0.032903456 .                | 0.014147032  | 5395   | other                   |
| SRRM1    | 3 | 1 | 0 | .     | 201225_s_at  | 0.243797948 .                | 0.69967427   | 10250  | other                   |
| CCL4     | 3 | 1 | 0 | .     | 204103_at    | -0.459547058 .               | -0.113533252 | 6351   | cytokine                |
| PPP2R2B  | 3 | 1 | 0 | snail | 205643_s_at  | 0.026537035 lung             | -0.318493336 | 5521   | phosphatase             |



Table S6 Survival Analyses

**Word color**    **Annotation:**  
 black            Only hub genes were included in the analysis (affecting spectrum and SNR).  
 purple            All genes were included in the analysis (affecting spectrum and SNR).  
 \* : data in HG\_U133plus2 platform; all others in HG-U133A

**Cell values: p-values of K-M survival analyses**

( ) : poorer prognosis quartiles  
 [ ] : better prognosis quartiles

**Topological weights (affecting wt.epx, mag, spec and SNR):**

upper row - degree, i.e. numbers of connected genes  
 lower row (foc) - for intermodular hubs only, estimated perturbed effect

**A. Overall Survival – Consensus TSLC Networks**

| Merged Data    | intra - 20 genes used |        |     |      |      | inter - 12 |        |             |      |     | both intra + inter = 32 |        |     |      |      |             |
|----------------|-----------------------|--------|-----|------|------|------------|--------|-------------|------|-----|-------------------------|--------|-----|------|------|-------------|
| N = 828        | epx                   | wt.epx | mag | spec | SNR  | epx        | wt.epx | mag         | spec | SNR | epx                     | wt.epx | mag | spec | SNR  |             |
| Ed = 387 (47%) | x                     | x      | x   |      | 0.02 | 0.04       | x      | 0.049 (foc) | x    | x   | x                       | x      | x   |      | 0.02 | 0.049 (foc) |

**B. Overall Survival – Lung TSLC Networks**

| Merged Data    | intra = 44 genes (43 in HG-U133A) |        |     |      |     | inter - 25 |        |     |      |     | both intra + inter =69 (68) |        |     |      |     |
|----------------|-----------------------------------|--------|-----|------|-----|------------|--------|-----|------|-----|-----------------------------|--------|-----|------|-----|
| N = 828        | epx                               | wt.epx | mag | spec | SNR | epx        | wt.epx | mag | spec | SNR | epx                         | wt.epx | mag | spec | SNR |
| Ed = 387 (47%) | x                                 | x      | x   | x    | x   |            | 0.01   | x   | x    | x   | x                           | x      | x   | x    | x   |

**C. Metastasis-Free Survival – Consensus TSLC Networks**

| Merged Data    | intra - 20 genes used |        |     |      |      | inter - 12 |        |            |      |     | both intra + inter = 32 |        |     |      |     |
|----------------|-----------------------|--------|-----|------|------|------------|--------|------------|------|-----|-------------------------|--------|-----|------|-----|
| N = 374        | epx                   | wt.epx | mag | spec | SNR  | epx        | wt.epx | mag        | spec | SNR | epx                     | wt.epx | mag | spec | SNR |
| Em = 134 (36%) | x                     | x      | x   | x    | 0.01 | x          | x      | 0.03 (foc) | x    | x   | 0.008                   | x      | x   | x    | x   |

**D. Metastasis-Free Survival – Lung TSLC Networks**

| Merged Data    | intra = 44 genes (43 in HG-U133A) |        |     |      |     | inter - 25 |        |     |      |     | both intra + inter =69 (68) |        |      |      |       |      |
|----------------|-----------------------------------|--------|-----|------|-----|------------|--------|-----|------|-----|-----------------------------|--------|------|------|-------|------|
| N = 374        | epx                               | wt.epx | mag | spec | SNR | epx        | wt.epx | mag | spec | SNR | epx                         | wt.epx | mag  | spec | SNR   |      |
| Em = 134 (36%) | x                                 | x      | x   | x    | x   |            | 0.005  | x   | x    | x   |                             | 0.02   | 0.02 | x    | 0.003 | 0.03 |

**E. Overall Survival – Lung TSLC Networks**

| Data set | intra = 44 genes (43 in HG-U133A) |                |               |           |             | inter - 25   |             |               |               |            | both intra + inter =69 (68) |                 |               |           |              |
|----------|-----------------------------------|----------------|---------------|-----------|-------------|--------------|-------------|---------------|---------------|------------|-----------------------------|-----------------|---------------|-----------|--------------|
|          | epx                               | wt.epx         | mag           | spec      | SNR         | epx          | wt.epx      | mag           | spec          | SNR        | epx                         | wt.epx          | mag           | spec      | SNR          |
| GSE3141* | N=111<br>(3); 0.007               | x              | x             | x         | x           | x            | x           | x             | x             | (23,14];   | x                           | x               | x             | (3); 0.02 | x            |
|          | 58/111=52%                        |                |               |           |             | <b>foc</b>   | x           | [3]; 0.04     | x             | x          | <b>foc</b>                  | x               | [3]; 0.03     | x         | x            |
| GSE4573  | N=130<br>67/130=52%               | x              | x             | x         | x           | x (4); 0.04  | x           | (4); 0.03     | (23,14];      | x          | x                           | x               | [4]; 0.01     | (1,23,4]; | (4); 0.04    |
| DFCI     | N=82<br>35/82=43%                 | x              | (24,13]; 0.04 | x         | x (1); 0.04 | x            | x           | (34,12]; 0.02 | (24,13]; 0.03 | x          | x                           | (3); 0.02       | (23,14];0.005 | x         | x            |
| HLM      | N=92<br>70/92=76%                 | (3,14,2]; 0.01 | x             | x         | (2); 0.01   | x            | [1]; 0.01   | x             | x             | (2); 0.02  | x                           | x               | x             | x         | x            |
| UMMI     | N=177<br>102/177=58%              | x              | x             | x         | x           | x (2); 0.003 | (4); 0.01   | x             | x             | [1]; 0.046 | x                           | x               | x             | [2]; 0.03 | x (3); 0.002 |
| MSK1     | N=107<br>31/107=29%               | (34,12]; 0.01  | (4,3,2,1];    | x         | x           | x (2); 0.03  | (34,12];    | x             | x             | x          | (34,12];                    | (34,12]; 0.0004 | x             | x         | x            |
| MSK2     | N=129<br>24/129=19%               | x              | x             | (2); 0.01 | (23); 0.007 | (2); 0.02    | (34); 0.008 | (3); 0.03     | x             | (23); 0.03 | x                           | (34); 0.007     | x             | x         | x            |
|          |                                   |                |               |           |             | <b>foc</b>   | x           | x             | x             | x          | <b>foc</b>                  | x               | x             | x         | x            |

**F. Metastasis-Free Survival – Lung TSLC Networks**

| Data set | intra = 44 genes (43 in HG-U133A) |               |           |           |            | inter - 25 |        |           |           |                | both intra + inter =69 (68) |            |     |           |           |
|----------|-----------------------------------|---------------|-----------|-----------|------------|------------|--------|-----------|-----------|----------------|-----------------------------|------------|-----|-----------|-----------|
|          | epx                               | wt.epx        | mag       | spec      | SNR        | epx        | wt.epx | mag       | spec      | SNR            | epx                         | wt.epx     | mag | spec      | SNR       |
| GSE8894* | N=138<br>69/138=50%               | x             | x         | x         | (1); 0.001 | x          | x      | x         | x         | x              | x                           | (4); 0.03  | x   | (3); 0.02 | (3,24,1]; |
| MSK1     | N=107<br>44/107=41%               | (34,12]; 0.02 | (4,23,1]; | x         | x          | x          | x      | (4); 0.02 | (1); 0.03 | (34,12]; 0.002 | (34,12]; 0.005              | x          | x   | x         | x         |
| MSK2     | N=129<br>21/129=16%               | x             | x         | [1]; 0.04 | (3); 0.04  | x          | x      | x         | x         | (1); 0.04      | <b>foc</b>                  | [3]; 0.006 | x   | x         | (1); 0.04 |
|          |                                   |               |           |           |            | <b>foc</b> | x      | x         | x         | x              | <b>foc</b>                  | (4); 0.03  | x   | x         | x         |

**Table S7** Clinicopathological characteristics of 125 patients with Lung adenocarcinoma

| Patient characteristics | Total of 125 patients      |                 |
|-------------------------|----------------------------|-----------------|
|                         | Surgery + adjuvant therapy | Definitive CCRT |
| Numbers of patients     | 45                         | 80              |
| Age                     |                            |                 |
| Range                   | 40-83                      | 37-79           |
| Median                  | 61                         | 60              |
| Cancer stage            |                            |                 |
| I-II                    | 10                         | 25              |
| III-IV                  | 35                         | 55              |
| OCT4 staining           |                            |                 |
| Negative                | 18                         | 31              |
| Positive                | 27                         | 49              |
| CBX5 staining           |                            |                 |
| Negative                | 17                         | 32              |
| Positive                | 28                         | 48              |
